# Supplementary material
Source: publisher figshare collection journal article supplement (https://gsapubs.figshare.com/articles/dataset/_/12535901)
Supplement: Supplementary file 1 [file 1]

GSA Data Repository Item 2017395

O'Brien, T.M., Miller, E.L., Pease, V., Hayden, L.A., Fisher, C.M., Hourigan, J.K., and Vervoort, J.D., 2017, Provenance, U-Pb detrital zircon geochronology, Hf isotopic analyses, and Cr-spinel geochemistry of the northeast Yukon-Koyukuk Basin: Implications for interior basin development and sedimentation in Alaska: GSA Bulletin, <https://doi.org/10.1130/B31825.1>.

## DATA REPOSITORY

Supplementary Table 1

Supplementary Table 2. Raw proportions of heavy mineral phases in Yukon

Supplementary Table 3

Supplementary Table 4. U-Pb geochronology of detrital zircons from the Kobuk Koyukuk Basin

Supplementary Table 5. U-Pb geochronology results of gabbroic clasts

Supplementary Table 6. U-Pb geochronology of Ruby Batholith plutons of the Ruby terrane

Supplementary Table 7. Lu-Hf isotopic results from detrital and igneous zircons

### Additional Lu-Hf methods

To account for the offset between measured  $^{176}\text{Hf}/^{177}\text{Hf}$  of reference zircons and their “accepted” values, calibration to an external zircon standard was employed. Fisher et al. (2011) indicated that this approach more accurately reflects instrumental conditions (including mass bias) during the laser ablation analyses of unknowns and uses the Plesovice zircon standard ( $^{176}\text{Hf}/^{177}\text{Hf}$  value of  $0.282482 \pm 13$ ) to normalize all other zircons analyzed in this study. The typical correction factor is 1.00015.

The Lu-Hf data reduction followed the protocol of Fisher et al. (2014) using the Iolite software program that was customized for in-house usage at WSU. Each Hf isotope analysis consists of 30 s of on-peak baseline (gas blank) followed by 65 s of ablation. The Iolite “auto spline” is fit to the mean baseline intensity determined for each isotope and is subtracted from signal intensities measured for each measurement cycle, or “integration” during ablation (Paton et al., 2010). The Yb mass bias, to correct for the  $^{176}\text{Yb}$  interference on  $^{176}\text{Hf}$ , was determined for each integration of the zircon analyses by measuring the  $^{173}\text{Yb}/^{171}\text{Yb}$  ratio relative to  $^{173}\text{Yb}/^{171}\text{Yb} = 1.13285$  (Segal et al., 2003) using the exponential law. The  $^{176}\text{Yb}$  interference is then corrected using the measured voltage of  $^{173}\text{Yb}$ , the Yb mass bias, an adjusted  $^{176}\text{Yb}/^{173}\text{Yb}$  of 0.79639, also applied for each integration. The  $^{176}\text{Yb}/^{173}\text{Yb}$  used at WSU was calibrated based on numerous measurements of synthetic zircons with a wide range of Yb/Hf. The mass bias of Hf is determined by the measurement of  $^{179}\text{Hf}/^{177}\text{Hf}$ , using the exponential law and a value for  $^{179}\text{Hf}/^{177}\text{Hf}$  of 0.7325 (Patchett and Tatsumoto, 1980). Results from the Hf isotope analyses are presented in Supplementary Data Table 7. Due to the size of the zircons ( $<40\text{ }\mu\text{m}$ ) compared to the laser slot diameter, sample BRHR14–8 (Bonanza Pluton) was not analyzed for Lu-Hf.

## REFERENCES CITED

- Fisher, C.M., Hanchar, J.M., Samson, S.D., Dhuime, B., Blichert-Toft, J., Vervoort, J.D., and Lam, R., 2011, Synthetic zircon doped with hafnium and rare earth elements: A reference material for in situ hafnium isotope analysis: *Chemical Geology*, v. 286, p. 32–47, <https://doi.org/10.1016/j.chemgeo.2011.04.013>.
- Fisher, C.M., Vervoort, J.D., and DuFrane, S.A., 2014, Accurate Hf isotope determinations of complex zircons using the “laser ablation split stream” method: *Geochemistry Geophysics Geosystems*, v. 15, p. 121–139, doi:<https://doi.org/10.1002/2013GC004962>.
- Patchett, P.J., and Tatsumoto, M., 1980, Lu-Hf total-rock isochron for the eucrite meteorites: *Nature*, v. 288, p. 571–574, <https://doi.org/10.1038/288571a0>.
- Paton, C., Woodhead, J.E., Hellstrom, J.C., Hergt, J.M., Greig, A., and Mass, R., 2010, Improved laser ablation U-Pb zircon geochronology through robust downhole fractionation correction: *Geochemistry, Geophysics, Geosystems*, v. 11, Q0AA06, doi:10.1029/2009GC002618.
- Segal, I., Halicz, L., and Platzner, I.T., 2003, Accurate isotope ratio measurements of ytterbium by multiple collection inductively coupled plasma mass spectrometry applying erbium and hafnium in an improved double external normalization procedure: *Journal of Analytical Atomic Spectrometry*, v. 18, p. 1217–1223, <https://doi.org/10.1039/b307016f>.

**SUPPLEMENTARY TABLE 1****Kobuk Koyukuk Detrital Zircon Samples**

| Sample       | Latitude | Longitude  | Sediment Type |
|--------------|----------|------------|---------------|
| BRJR13-K1c   | 67.13081 | -151.84866 | 3             |
| BRJR13-K2    | 67.12331 | -151.88650 | 3             |
| BRJR13-K4    | 67.10410 | -151.90341 | 3             |
| BRJR13-K8a,b | 67.04972 | -151.80911 | 1             |
| BRJR13-K10   | 66.97217 | -151.77534 | 1             |
| BRJR13-K13   | 66.96473 | -161.63725 | 1             |
| BRK14-1      | 66.94365 | -151.49437 | 1             |
| BRK14-2      | 66.95888 | -151.44429 | 1             |
| BRK14-4      | 67.00058 | -151.37514 | 2             |
| BRK14-5      | 67.02470 | -151.13617 | 2             |
| BRK14-6      | 67.04401 | -150.96781 | 2             |
| BRK14-7a     | 67.05321 | -150.89839 | 2             |
| BRK14-8      | 67.05725 | -150.74413 | 2             |
| BRK14-9      | 67.05759 | -150.68266 | 2             |
| BRK14-10     | 67.07908 | -150.64569 | 2             |
| BRHR14-1     | 66.99385 | -150.29173 | 2             |
| BRNF15-58a,b | 67.10089 | -150.94406 | 2             |
| BRNF15-59    | 67.09377 | 150.92844  | 2             |
| BRNF15-60    | 67.09226 | -150.96120 | 2             |
| BRNF15-61    | 67.06725 | -150.97581 | 2             |

**Ruby Batholith Samples**

| Sample   | Latitude | Longitude  | Pluton name |
|----------|----------|------------|-------------|
| BRHR14-2 | 66.99123 | -150.28926 | Jim River   |
| BRHR14-7 | 66.71753 | -150.66723 | Bonanza     |
| BRHR14-8 | 66.77020 | -150.67111 | Bonanza     |

**Brooks Range Detrital Zircon Samples**

| Sample     | Latitude | Longitude  | Formation          |
|------------|----------|------------|--------------------|
| BRJR13-HF1 | 67.76040 | -152.38437 | Hunt Fork          |
| BRJR13-HF3 | 67.75354 | -152.36230 | Hunt Fork          |
| BRJR13-HF7 | 67.76893 | -152.39911 | Hunt Fork          |
| BRJR13-SA1 | 67.74483 | -152.40138 | Sillyasheen        |
| BRJR13-SA3 | 67.69317 | -152.32903 | Sillyasheen        |
| ELM13-BR07 | 67.69317 | -152.32903 | Sillyasheen        |
| BRJR13-BC1 | 67.66329 | -152.31403 | Beaucoup           |
| BRJR13-BC2 | 67.66199 | -152.32350 | Beaucoup           |
| BRJR13-MS9 | 67.16293 | -151.89006 | MzPzs <sup>1</sup> |

1) Unnamed lithic unit -- Mississippian - Triassic quartzite and phyllite

**Supplementary Table 2 - Raw proportions of heavy mineral phases in Yukon Koyukuk Basin sediments**

BRJR13-K1C

| Mineral    | Site 1 | Site 2 | Site 3 | Site 4 | Site 5 | Site 6 | Site 7 | Site 8 | Site 9 | Site 10 | Site 11 | Site 12 | Site 13 | Site 14 | Site 15 | Site 16 | Site 17 | Site 18 | Site 19 | Site 20 | Total | Average (%) |
|------------|--------|--------|--------|--------|--------|--------|--------|--------|--------|---------|---------|---------|---------|---------|---------|---------|---------|---------|---------|---------|-------|-------------|
| apatite    | 1.2    | 0.5    | 0.1    | 1.2    | 0.1    | 0.9    | 1.3    | 0.2    | 0      | 0       | 0.3     | 0       | 0       | 0       | 0       | 0       | 0.2     | 0       | 0       | 0.1     | 6.1   | 2.3         |
| Chloritoid | 0      | 0.2    | 0      | 0      | 0      | 0      | 0      | 0.8    | 0.4    | 0.3     | 0       | 0.5     | 0       | 0.4     | 0.5     | 0       | 0.2     | 0.4     | 0       | 0       | 3.7   | 1.4         |
| Cr-Spinel  | 0      | 0.1    | 1.7    | 0      | 0      | 0      | 0      | 0      | 0      | 1.1     | 0       | 0       | 1.3     | 0       | 0.5     | 0       | 0       | 0       | 1       | 0       | 5.7   | 2.1         |
| monazite   | 4.2    | 2.2    | 1.6    | 2.3    | 5.7    | 2.3    | 0.5    | 1.1    | 0.4    | 1.7     | 3.3     | 2.7     | 0       | 4.8     | 10.3    | 1.1     | 1.1     | 1.4     | 1.7     | 3.1     | 51.5  | 19.1        |
| Rutile     | 1      | 10.2   | 20     | 4.3    | 18     | 5.1    | 7.6    | 10.8   | 0.9    | 11.2    | 6.9     | 12      | 12.1    | 18.1    | 11.8    | 12.8    | 10.8    | 3.3     | 10.2    | 7.2     | 194.3 | 72.0        |
| xenotime   | 0.3    | 0.7    | 1.1    | 0.1    | 0.4    | 0.1    | 0      | 0.2    | 0.3    | 0.9     | 0.4     | 0.4     | 0.5     | 1.3     | 0.2     | 0.1     | 0.2     | 0.3     | 0.5     | 0.4     | 8.4   | 3.1         |

BRJR13-K2

| Mineral    | Site 1 | Site 2 | Site 3 | Site 4 | Site 5 | Site 6 | Site 7 | Site 8 | Site 9 | Site 10 | Site 11 | Site 12 | Site 13 | Site 14 | Site 15 | Site 16 | Site 17 | Site 18 | Site 19 | Site 20 | Total | Average (%) |
|------------|--------|--------|--------|--------|--------|--------|--------|--------|--------|---------|---------|---------|---------|---------|---------|---------|---------|---------|---------|---------|-------|-------------|
| Biotite    | 4.4    | 8.3    | 4.5    | 4.5    | 2.6    | 6.6    | 4.2    | 1.2    | 4.1    | 2.1     | 11.5    | 2.5     | 0.3     | 0.5     | 5.4     | 3.1     | 4.4     | 2.7     | 4.4     | 6.6     | 83.9  | 49.7        |
| Chloritoid | 1.3    | 4.4    | 0.4    | 0      | 4.9    | 0      | 0.6    | 2.3    | 1.2    | 1.6     | 1.0     | 7.6     | 2.7     | 11.7    | 0.7     | 5.2     | 2.8     | 7.6     | 2.2     | 0       | 58.2  | 34.5        |
| Rutile     | 2.2    | 0.1    | 1.3    | 2.6    | 2.4    | 2.6    | 0.3    | 0      | 2.8    | 1.6     | 0.7     | 0.7     | 0.3     | 0.6     | 1.3     | 2       | 0.9     | 0.5     | 1.2     | 2.6     | 26.7  | 15.8        |
|            |        |        |        |        |        |        |        |        |        |         |         |         |         |         |         |         |         |         |         |         | 168.8 | 100.0       |

BRJR13-K4

| Mineral    | Site 1 | Site 2 | Site 3 | Site 4 | Site 5 | Site 6 | Site 7 | Site 8 | Site 9 | Site 10 | Site 11 | Site 12 | Site 13 | Site 14 | Site 15 | Site 16 | Site 17 | Site 18 | Site 19 | Site 20 | Total | Average (%) |
|------------|--------|--------|--------|--------|--------|--------|--------|--------|--------|---------|---------|---------|---------|---------|---------|---------|---------|---------|---------|---------|-------|-------------|
| Apatite    | 3.2    | 6.2    | 7.2    | 5.1    | 0.9    | 5      | 4      | 3      | 5.3    | 5.6     | 2.5     | 3.8     | 6.9     | 5.4     | 1.4     | 2.1     | 1.3     | 0.1     | 5.5     | 1.6     | 76.1  | 16.2        |
| Biotite    | 4.4    | 6.1    | 0      | 6.8    | 5.5    | 7.3    | 1      | 10.6   | 5.8    | 5.9     | 5.6     | 4.2     | 2.8     | 0       | 6.3     | 7.7     | 0       | 0       | 5.1     | 7.4     | 92.5  | 19.7        |
| Chloritoid | 9.1    | 8.7    | 4.9    | 14.1   | 17.1   | 17     | 10.7   | 6.3    | 7.4    | 14.3    | 9.8     | 9       | 9       | 15.2    | 5.1     | 17.8    | 19.8    | 12.3    | 14.4    | 11.9    | 233.9 | 49.8        |
| Rutile     | 2.6    | 0.1    | 1.4    | 2.1    | 5.6    | 4.5    | 0.3    | 3      | 4.3    | 3.5     | 4.3     | 2.6     | 3.8     | 5.7     | 1.7     | 4.6     | 2.4     | 3.2     | 4.8     | 4.9     | 65.4  | 13.9        |
| Xenotime   | 0.1    | 0.1    | 0      | 0      | 0      | 0      | 0      | 0      | 1.3    | 0.2     | 0       | 0       | 0       | 0       | 0       | 0       | 0       | 0       | 0       | 0       | 1.7   | 0.4         |

BRK14-K2

| Mineral   | Site 1 | Site 2 | Site 3 | Site 4 | Site 5 | Site 6 | Site 7 | Site 8 | Site 9 | Site 10 | Site 11 | Site 12 | Site 13 | Site 14 | Site 15 | Site 16 | Site 17 | Site 18 | Site 19 | Site 20 | Total | Average (%) |
|-----------|--------|--------|--------|--------|--------|--------|--------|--------|--------|---------|---------|---------|---------|---------|---------|---------|---------|---------|---------|---------|-------|-------------|
| Apatite   | 0.9    | 0.5    | 0.4    | 0      | 0      | 0.7    | 0      | 0      | 0.1    | 0       | 0       | 0       | 1       | 0       | 0.1     | 1.1     | 0.1     | 0.8     | 0       | 0.1     | 5.8   | 2.5         |
| Cr-Spinel | 2      | 2.5    | 0.8    | 2      | 3.2    | 2      | 2.2    | 0.7    | 1      | 1.2     | 0       | 2.4     | 3.3     | 2.3     | 1.3     | 2.4     | 0.6     | 3.7     | 1.3     | 0.7     | 35.6  | 15.5        |
| Rutile    | 0      | 0.1    | 0      | 0      | 0      | 1.2    | 0      | 0.1    | 0      | 0       | 0       | 0       | 0       | 0       | 0.4     | 0       | 0       | 0       | 0.6     | 0       | 2.4   | 1.0         |
| Sphene    | 11.3   | 9.9    | 8.2    | 9.7    | 10.2   | 6.3    | 7      | 12.6   | 7      | 9.9     | 3.2     | 14.4    | 7.3     | 9.5     | 6.4     | 12.3    | 7.1     | 9.6     | 13.9    | 10.7    | 186.5 | 81.0        |

BRJR13-K8a

| Mineral       | Site 1 | Site 2 | Site 3 | Site 4 | Site 5 | Site 6 | Site 7 | Site 8 | Site 9 | Site 10 | Site 11 | Site 12 | Site 13 | Site 14 | Site 15 | Site 16 | Site 17 | Site 18 | Site 19 | Site 20 | Total | Average (%) |
|---------------|--------|--------|--------|--------|--------|--------|--------|--------|--------|---------|---------|---------|---------|---------|---------|---------|---------|---------|---------|---------|-------|-------------|
| Clinopyroxene | 18.6   | 3.0    | 3.5    | 7.0    | 8.9    | 5.9    | 1.0    | 2.9    | 6.2    | 16.7    | 5.4     | 3.1     | 0.8     | 5.3     | 1.7     | 3.9     | 2.6     | 8.4     | 4.2     | 6.0     | 115.1 | 43.3        |
| Cr-Spinel     | 2.7    | 5.2    | 0.0    | 1.8    | 1.5    | 0.8    | 0.5    | 3.0    | 0.5    | 3.5     | 3.4     | 2.7     | 2.2     | 2.1     | 1.4     | 0.3     | 1.1     | 1.0     | 2.4     | 2.0     | 38.1  | 14.3        |
| Hornblende    | 8.0    | 2.0    | 6.4    | 3.5    | 3.0    | 5.2    | 0.6    | 5.6    | 8.0    | 4.2     | 2.6     | 4.2     | 2.0     | 2.8     | 3.4     | 3.8     | 3.8     | 7.6     | 0.0     | 4.2     | 80.8  | 30.4        |
| Ilmenite      | 0.2    | 0.0    | 0.0    | 0.0    | 0.2    | 0.0    | 0.0    | 0.0    | 0.1    | 0.0     | 0.0     | 0.5     | 0.0     | 0.0     | 0.0     | 0.0     | 0.0     | 0.0     | 0.0     | 0.1     | 1.1   | 0.4         |
| Sphene        | 1.0    | 1.6    | 0.0    | 0.0    | 3.9    | 1.7    | 2.2    | 0.4    | 2.5    | 1.5     | 2.5     | 1.1     | 1.8     | 2.7     | 3.0     | 0.0     | 0.0     | 2.5     | 0.6     | 1.5     | 30.5  | 11.5        |

**BRNF15-60**

| Mineral      | Site 1 | Site 2 | Site 3 | Site 4 | Site 5 | Site 6 | Site 7 | Site 8 | Site 9 | Site 10 | Site 11 | Site 12 | Site 13 | Site 14 | Site 15 | Site 16 | Site 17 | Site 18 | Site 19 | Site 20 | Total | Average (%) |
|--------------|--------|--------|--------|--------|--------|--------|--------|--------|--------|---------|---------|---------|---------|---------|---------|---------|---------|---------|---------|---------|-------|-------------|
| Apatite      | 0.1    | 0.0    | 0.6    | 0.3    | 0.4    | 2.3    | 1.6    | 2.1    | 0.3    | 0.5     | 0.1     | 0.0     | 0.4     | 1.5     | 0.1     | 0.9     | 0.7     | 0.7     | 1.6     | 1.2     | 15.4  | 5.0         |
| Clinopyroxer | 11.4   | 3.9    | 5.8    | 12.3   | 9.5    | 9.3    | 6.4    | 18.5   | 8.3    | 4.9     | 14.6    | 5.7     | 8.8     | 8.8     | 6.9     | 3.6     | 10.2    | 12.4    | 17.2    | 8.9     | 187.4 | 61.2        |
| Hornblende   | 3.2    | 2.4    | 1.2    | 1.7    | 3.4    | 2.7    | 2.5    | 0.8    | 2.4    | 3.0     | 0.8     | 4.7     | 0.3     | 3.0     | 2.2     | 0.7     | 2.4     | 2.8     | 2.5     | 3.5     | 46.2  | 15.1        |
| Ilmenite     | 1.7    | 0.0    | 0.0    | 3.4    | 2.7    | 2.5    | 0.8    | 0.0    | 0.9    | 3.2     | 2.1     | 0.6     | 1.3     | 0.7     | 1.3     | 0.1     | 0.0     | 0.5     | 0.8     | 0.0     | 22.6  | 7.4         |
| Rutile       | 0.0    | 0.0    | 0.0    | 0.0    | 0.0    | 0.0    | 0.0    | 0.0    | 0.0    | 0.2     | 0.2     | 0.0     | 0.0     | 0.2     | 0.0     | 0.8     | 0.0     | 0.0     | 0.3     | 0.2     | 1.9   | 0.6         |
| Sphene       | 0.5    | 2.8    | 2.3    | 0.8    | 1.2    | 3.2    | 1.1    | 3.1    | 0.0    | 1.3     | 0.0     | 1.8     | 1.7     | 0.3     | 2.0     | 2.3     | 2.8     | 1.7     | 1.5     | 2.2     | 32.6  | 10.7        |

**BRK14-7A**

| Mineral    | Site 1 | Site 2 | Site 3 | Site 4 | Site 5 | Site 6 | Site 7 | Site 8 | Site 9 | Site 10 | Site 11 | Site 12 | Site 13 | Site 14 | Site 15 | Site 16 | Site 17 | Site 18 | Site 19 | Site 20 | Total | Average (%) |
|------------|--------|--------|--------|--------|--------|--------|--------|--------|--------|---------|---------|---------|---------|---------|---------|---------|---------|---------|---------|---------|-------|-------------|
| Apatite    | 0.6    | 0.0    | 0.0    | 0.4    | 0.1    | 0.7    | 1.2    | 3.4    | 0.1    | 0.6     | 0.3     | 0.1     | 1.1     | 0.9     | 1.8     | 0.2     | 0.1     | 0.5     | 1.4     | 2.0     | 15.5  | 12.1        |
| Biotite    | 0.0    | 0.0    | 7.3    | 0.0    | 0.0    | 2.2    | 0.0    | 0.0    | 0.0    | 0.0     | 0.0     | 0.0     | 0.0     | 0.0     | 2.3     | 3.2     | 4.3     | 0.0     | 0.0     | 2.3     | 21.6  | 16.8        |
| Cr-Spinel  | 0.3    | 0.3    | 0.1    | 0.4    | 0.6    | 0.8    | 0.1    | 0.7    | 0.3    | 0.2     | 0.4     | 0.0     | 0.0     | 0.5     | 1.0     | 0.0     | 1.7     | 1.4     | 1.6     | 1.8     | 12.2  | 9.5         |
| hornblende | 0.0    | 0.0    | 0.0    | 0.0    | 0.0    | 0.0    | 0.0    | 0.0    | 0.0    | 0.0     | 0.4     | 0.0     | 0.4     | 0.0     | 0.0     | 0.0     | 0.0     | 0.3     | 0.1     | 2.1     | 3.3   | 2.6         |
| monazite   | 0.0    | 0.0    | 0.0    | 0.0    | 0.0    | 0.0    | 0.0    | 0.0    | 0.0    | 0.1     | 0.0     | 0.2     | 0.4     | 0.3     | 0.0     | 0.1     | 0.0     | 0.0     | 0.0     | 0.0     | 1.1   | 0.9         |
| Rutile     | 1.0    | 4.6    | 1.9    | 0.5    | 6.0    | 0.8    | 3.3    | 4.9    | 1.1    | 1.4     | 1.0     | 1.2     | 1.4     | 5.6     | 2.6     | 3.0     | 5.4     | 3.2     | 2.9     | 5.4     | 57.2  | 44.6        |
| Sphene     | 0.8    | 1.4    | 1.0    | 0.4    | 1.1    | 0.1    | 0.4    | 0.7    | 0.9    | 0.2     | 0.3     | 0.0     | 0.7     | 0.5     | 0.0     | 0.2     | 5.4     | 1.2     | 0.8     | 1.2     | 17.3  | 13.5        |

**BRJR13-K13a**

| Mineral      | Site 1 | Site 2 | Site 3 | Site 4 | Site 5 | Site 6 | Site 7 | Site 8 | Site 9 | Site 10 | Site 11 | Site 12 | Site 13 | Site 14 | Site 15 | Site 16 | Site 17 | Site 18 | Site 19 | Site 20 | Total | Average (%) |
|--------------|--------|--------|--------|--------|--------|--------|--------|--------|--------|---------|---------|---------|---------|---------|---------|---------|---------|---------|---------|---------|-------|-------------|
| Apatite      | 0.3    | 0.0    | 0.0    | 0.0    | 0.0    | 0.0    | 0.7    | 0.8    | 0.0    | 0.0     | 1.4     | 0.0     | 0.0     | 0.0     | 0.0     | 0.0     | 0.0     | 0.0     | 0.0     | 0.0     | 3.2   | 0.7         |
| Clinopyroxer | 0.0    | 0.0    | 0.0    | 0.0    | 0.0    | 1.9    | 0.0    | 0.0    | 0.0    | 0.0     | 0.0     | 0.7     | 0.5     | 0.0     | 2.1     | 0.0     | 0.0     | 0.0     | 0.0     | 0.0     | 5.2   | 1.1         |
| Cr-Spinel    | 9.1    | 8.2    | 11.2   | 5.5    | 5.4    | 8.7    | 6.9    | 2.9    | 7.2    | 6.4     | 14.8    | 8.2     | 8.1     | 8.6     | 5.9     | 11.9    | 4.4     | 8.9     | 7.1     | 8.8     | 158.2 | 34.4        |
| hornblende   | 2.8    | 4.9    | 0.2    | 4.4    | 3.0    | 5.1    | 4.6    | 3.4    | 2.1    | 0.0     | 1.8     | 1.1     | 0.7     | 4.6     | 0.5     | 0.0     | 1.2     | 0.9     | 0.6     | 2.2     | 44.1  | 9.6         |
| Rutile       | 0.1    | 0.0    | 3.2    | 2.9    | 1.8    | 1.1    | 1.2    | 1.0    | 0.3    | 2.1     | 1.1     | 0.3     | 1.3     | 2.2     | 0.8     | 0.7     | 2.1     | 0.0     | 1.6     | 0.9     | 24.7  | 5.4         |
| Sphene       | 11.9   | 12.8   | 13.0   | 12.4   | 9.4    | 16.4   | 9.9    | 11.9   | 8.9    | 11.0    | 10.3    | 8.0     | 16.5    | 8.9     | 8.8     | 7.9     | 9.8     | 12.1    | 13.7    | 11.5    | 225.1 | 48.9        |

**BRNF15-58a**

| Mineral      | Site 1 | Site 2 | Site 3 | Site 4 | Site 5 | Site 6 | Site 7 | Site 8 | Site 9 | Site 10 | Site 11 | Site 12 | Site 13 | Site 14 | Site 15 | Site 16 | Site 17 | Site 18 | Site 19 | Site 20 | Total | Average (%) |
|--------------|--------|--------|--------|--------|--------|--------|--------|--------|--------|---------|---------|---------|---------|---------|---------|---------|---------|---------|---------|---------|-------|-------------|
| Apatite      | 1.7    | 2.1    | 0.0    | 2.4    | 1.4    | 1.4    | 0.6    | 3.3    | 1.3    | 0.4     | 4.7     | 0.8     | 0.1     | 3.1     | 0.9     | 21.1    | 1.1     | 1.1     | 0.2     | 0.0     | 47.7  | 11.3        |
| Clinopyroxer | 12.2   | 8.1    | 2.9    | 6.6    | 6.8    | 5.3    | 4.2    | 5.8    | 6.9    | 8.8     | 5.1     | 5.6     | 9.0     | 3.9     | 6.4     | 11.5    | 7.5     | 15.5    | 6.0     | 10.1    | 148.2 | 35.1        |
| Cr-Spinel    | 0.0    | 0.0    | 0.0    | 0.0    | 0.7    | 0.0    | 0.0    | 0.5    | 0.0    | 0.0     | 0.0     | 0.0     | 0.0     | 0.0     | 0.0     | 1.2     | 0.7     | 0.0     | 0.0     | 0.0     | 3.1   | 0.7         |
| Hornblende   | 0.0    | 1.0    | 4.1    | 4.0    | 0.7    | 8.6    | 10.4   | 7.3    | 12.4   | 0.9     | 4.6     | 4.5     | 5.3     | 12.0    | 17.0    | 0.0     | 9.2     | 1.7     | 5.7     | 1.1     | 110.5 | 26.2        |
| Ilmenite     | 3.2    | 2.9    | 1.9    | 3.5    | 4.6    | 6.2    | 5.7    | 0.0    | 5.5    | 6.3     | 5.4     | 3.7     | 7.0     | 3.7     | 1.6     | 1.4     | 6.1     | 3.0     | 1.4     | 3.5     | 76.6  | 18.1        |
| Rutile       | 1.3    | 0.1    | 0.5    | 2.2    | 0.3    | 0.9    | 0.4    | 0.9    | 0.0    | 0.4     | 0.7     | 1.6     | 1.6     | 0.0     | 0.0     | 0.3     | 1.3     | 0.0     | 0.0     | 0.5     | 13.0  | 3.1         |
| Sphene       | 1.7    | 0.9    | 2.8    | 1.8    | 1.1    | 0.4    | 2.6    | 0.3    | 0.9    | 1.0     | 2.1     | 0.2     | 0.3     | 1.1     | 0.5     | 1.7     | 0.5     | 1.5     | 1.6     | 0.0     | 23.0  | 5.4         |

**SUPPLEMENTARY TABLE 3****Chrome Spinel chemistry****BRJR13-K13a****Type 1**

| <b>Analysis</b> | <b>MgO</b> | <b>Al<sub>2</sub>O<sub>3</sub></b> | <b>Cr<sub>2</sub>O<sub>3</sub></b> | <b>FeO</b> | <b>TiO<sub>2</sub>*</b> | <b>Total</b> |
|-----------------|------------|------------------------------------|------------------------------------|------------|-------------------------|--------------|
| 1               | 16.6       | 34.5                               | 30.9                               | 16.8       | 0.4                     | 99.2         |
| 2               | 14.1       | 30.2                               | 37.2                               | 16.8       | 0.2                     | 98.6         |
| 3               | 6.4        | 17.2                               | 40.3                               | 33.0       | 1.3                     | 98.2         |
| 4               | 15.2       | 32.6                               | 31.7                               | 19.7       | 0.6                     | 99.8         |
| 5               | 7.5        | 17.1                               | 45.7                               | 29.0       | 0.3                     | 99.5         |
| 6               | 11.0       | 23.0                               | 40.2                               | 24.6       | 0.3                     | 99.2         |
| 7               | 14.6       | 31.4                               | 38.1                               | 15.7       | 0.2                     | 100.0        |
| 8               | 9.2        | 20.5                               | 45.5                               | 23.2       | 0.2                     | 98.6         |
| 9               | 8.4        | 7.6                                | 59.5                               | 23.0       | 0.2                     | 98.7         |
| 10              | 12.1       | 27.8                               | 38.9                               | 20.9       | 0.4                     | 100.0        |
| 11              | 13.4       | 24.9                               | 37.3                               | 23.4       | 0.8                     | 99.8         |
| 12              | 11.8       | 33.3                               | 32.5                               | 21.8       | 0.7                     | 100.0        |
| 13              | 13.8       | 22.1                               | 46.4                               | 16.4       | 0.2                     | 98.9         |
| 14              | 7.1        | 16.2                               | 47.5                               | 28.1       | 0.4                     | 99.3         |
| 15              | 10.6       | 26.6                               | 37.4                               | 23.6       | 0.3                     | 98.5         |
| 16              | 11.8       | 25.6                               | 39.5                               | 21.6       | 0.2                     | 98.7         |
| 17              | 11.4       | 24.3                               | 42.9                               | 20.2       | 0.3                     | 99.0         |
| 18              | 16.0       | 35.4                               | 31.9                               | 16.1       | 0.2                     | 99.6         |
| 19              | 13.5       | 29.9                               | 39.1                               | 16.6       | 0.2                     | 99.3         |
| 20              | 10.1       | 24.5                               | 40.0                               | 25.1       | 0.4                     | 100.0        |
| 21              | 10.0       | 26.2                               | 37.9                               | 25.9       | 0.3                     | 100.3        |
| 22              | 8.0        | 21.8                               | 35.3                               | 33.8       | 0.6                     | 99.4         |
| 23              | 10.3       | 30.4                               | 33.2                               | 24.4       | 0.2                     | 98.4         |
| 24              | 11.7       | 24.8                               | 39.1                               | 23.3       | 0.7                     | 99.6         |
| 25              | 11.8       | 22.5                               | 45.1                               | 19.5       | 0.3                     | 99.2         |
| 26              | 10.7       | 23.7                               | 38.5                               | 25.7       | 0.3                     | 98.9         |
| 27              | 5.0        | 15.4                               | 49.9                               | 27.6       | 0.2                     | 98.1         |
| 28              | 7.3        | 13.8                               | 51.6                               | 25.7       | 0.3                     | 98.7         |
| 29              | 9.5        | 13.8                               | 55.9                               | 19.2       | 0.2                     | 98.6         |
| 30              | 9.8        | 13.0                               | 56.3                               | 20.0       | 0.3                     | 99.3         |
| 31              | 10.3       | 26.7                               | 39.2                               | 22.5       | 0.2                     | 98.9         |
| 32              | 8.4        | 21.2                               | 45.0                               | 24.2       | 0.2                     | 99.0         |
| 33              | 13.1       | 24.5                               | 43.2                               | 18.1       | 0.1                     | 98.9         |
| 34              | 12.3       | 25.7                               | 38.5                               | 22.1       | 0.3                     | 98.9         |
| 35              | 13.0       | 30.0                               | 34.8                               | 21.1       | 0.4                     | 99.3         |
| 36              | 13.2       | 14.9                               | 50.2                               | 19.5       | 1.1                     | 98.9         |
| 37              | 7.4        | 26.1                               | 36.5                               | 28.9       | 0.2                     | 99.0         |
| 38              | 10.3       | 24.8                               | 38.5                               | 25.0       | 0.4                     | 98.9         |
| 39              | 13.6       | 36.8                               | 29.3                               | 19.6       | 0.2                     | 99.4         |
| 40              | 10.3       | 21.7                               | 40.1                               | 26.0       | 1.2                     | 99.2         |

**SUPPLEMENTARY TABLE 3**

| <b>BRJR13-K8a</b> |            | <b>Type 1</b>                      |                                    |            |                         |              |
|-------------------|------------|------------------------------------|------------------------------------|------------|-------------------------|--------------|
| <b>Analysis</b>   | <b>MgO</b> | <b>Al<sub>2</sub>O<sub>3</sub></b> | <b>Cr<sub>2</sub>O<sub>3</sub></b> | <b>FeO</b> | <b>TiO<sub>2</sub>*</b> | <b>Total</b> |
| 1                 | 14.9       | 33.1                               | 34.7                               | 17.4       | 0.4                     | 100.4        |
| 2                 | 7.4        | 10.5                               | 40.9                               | 36.8       | 0.3                     | 95.9         |
| 3                 | 14.9       | 25.8                               | 36.4                               | 19.0       | 0.5                     | 96.6         |
| 4                 | 3.5        | 5.7                                | 46.0                               | 43.6       | 0.3                     | 99.1         |
| 5                 | 13.7       | 37.7                               | 26.8                               | 21.3       | 0.7                     | 100.2        |
| 6                 | 8.9        | 21.2                               | 40.4                               | 27.5       | 0.3                     | 98.3         |
| 7                 | 10.5       | 24.8                               | 38.5                               | 24.7       | 0.3                     | 98.7         |
| 8                 | 9.3        | 11.7                               | 55.3                               | 22.1       | 0.2                     | 98.6         |
| 9                 | 6.7        | 12.6                               | 51.9                               | 28.6       | 0.2                     | 100.0        |
| 10                | 9.7        | 24.3                               | 40.4                               | 24.5       | -                       | 98.8         |
| 11                | 19.3       | 50.4                               | 15.6                               | 14.1       | 0.4                     | 99.7         |
| 12                | 9.2        | 23.6                               | 41.5                               | 24.4       | 0.3                     | 99.0         |
| 13                | 9.9        | 27.0                               | 35.0                               | 27.1       | 0.3                     | 99.3         |
| 14                | 8.8        | 24.1                               | 40.7                               | 25.0       | -                       | 98.4         |
| 15                | 16.3       | 26.5                               | 33.9                               | 15.7       | -                       | 92.4         |
| 16                | 12.4       | 26.6                               | 39.2                               | 21.0       | -                       | 99.1         |
| 17                | 7.9        | 9.7                                | 56.4                               | 26.1       | 0.2                     | 100.2        |
| 18                | 9.3        | 22.8                               | 42.0                               | 25.7       | 0.2                     | 100.0        |
| 19                | 9.2        | 22.5                               | 42.1                               | 25.4       | 0.3                     | 99.4         |
| 20                | 8.6        | 22.3                               | 40.3                               | 27.1       | 0.3                     | 98.6         |
| 21                | 8.6        | 19.6                               | 44.2                               | 26.7       | 0.9                     | 100.1        |
| 22                | 10.2       | 21.5                               | 42.2                               | 24.8       | 0.3                     | 99.0         |
| 23                | 10.7       | 21.3                               | 43.4                               | 23.5       | 0.3                     | 99.2         |
| 24                | 6.6        | 15.9                               | 48.5                               | 27.5       | 0.2                     | 98.7         |
| 25                | 15.8       | 29.1                               | 35.2                               | 19.1       | 0.3                     | 99.4         |
| 26                | 7.0        | 16.7                               | 43.7                               | 30.2       | 0.4                     | 98.0         |
| 27                | 10.6       | 22.0                               | 41.3                               | 25.4       | 0.2                     | 99.5         |
| 28                | 7.0        | 23.4                               | 37.1                               | 30.8       | 0.3                     | 98.6         |
| 29                | 9.7        | 18.3                               | 49.3                               | 21.4       | 0.5                     | 99.1         |
| 30                | 6.2        | 7.3                                | 50.1                               | 34.8       | 0.4                     | 98.8         |
| 31                | 13.3       | 26.1                               | 39.7                               | 19.5       | 0.2                     | 98.8         |
| 32                | 8.3        | 20.9                               | 44.3                               | 24.8       | 0.4                     | 98.7         |
| 33                | 8.4        | 21.7                               | 41.2                               | 26.6       | 0.4                     | 98.3         |
| 34                | 2.6        | 6.8                                | 53.2                               | 34.4       | 0.2                     | 97.2         |
| 35                | 10.4       | 21.6                               | 40.6                               | 26.4       | 0.3                     | 99.3         |
| 36                | 11.5       | 14.3                               | 52.0                               | 21.2       | 0.5                     | 99.3         |
| 37                | 11.9       | 29.5                               | 34.8                               | 22.2       | -                       | 98.4         |
| 38                | 6.2        | 12.9                               | 51.1                               | 29.7       | 0.3                     | 100.3        |
| 39                | 7.5        | 20.8                               | 40.2                               | 30.7       | 0.4                     | 99.6         |
| 40                | 12.3       | 26.5                               | 38.8                               | 21.8       | 0.3                     | 99.6         |
| 41                | 12.4       | 28.3                               | 37.5                               | 21.7       | 0.3                     | 100.1        |
| 42                | 12.5       | 29.2                               | 37.4                               | 20.3       | 0.8                     | 100.2        |
| 43                | 9.0        | 21.6                               | 41.0                               | 26.3       | 0.4                     | 98.3         |
| 44                | 14.7       | 42.2                               | 24.9                               | 17.8       | 0.3                     | 99.9         |
| 45                | 6.0        | 9.0                                | 51.5                               | 32.2       | 0.3                     | 99.0         |
| 46                | 17.8       | 46.2                               | 20.6                               | 14.2       | 0.3                     | 99.2         |
| 47                | 11.8       | 15.5                               | 52.5                               | 18.5       | -                       | 98.2         |

**SUPPLEMENTARY TABLE 3**

| <b>BRK14-2</b>  |            | <b>Type 1</b>                      |                                    |            |                         |              |
|-----------------|------------|------------------------------------|------------------------------------|------------|-------------------------|--------------|
| <b>Analysis</b> | <b>MgO</b> | <b>Al<sub>2</sub>O<sub>3</sub></b> | <b>Cr<sub>2</sub>O<sub>3</sub></b> | <b>FeO</b> | <b>TiO<sub>2</sub>*</b> | <b>Total</b> |
| 1               | 16.0       | 38.2                               | 29.7                               | 15.1       | 0.2                     | 99.1         |
| 2               | 7.9        | 11.2                               | 50.9                               | 29.4       | 0.3                     | 99.8         |
| 3               | 9.6        | 25.7                               | 39.4                               | 23.8       | 0.2                     | 98.6         |
| 4               | 9.7        | 10.9                               | 57.1                               | 20.3       | 0.3                     | 98.3         |
| 5               | 9.2        | 18.1                               | 43.2                               | 27.2       | 1.4                     | 99.0         |
| 6               | 16.8       | 43.2                               | 22.4                               | 16.6       | 0.2                     | 99.2         |
| 7               | 10.9       | 15.4                               | 52.1                               | 20.4       | 0.3                     | 99.0         |
| 8               | 15.0       | 29.2                               | 39.5                               | 15.5       | 0.0                     | 99.3         |
| 9               | 9.0        | 22.0                               | 46.2                               | 17.2       | 0.3                     | 94.8         |
| 10              | 10.6       | 27.0                               | 39.3                               | 21.9       | 0.4                     | 99.3         |
| 11              | 15.1       | 40.5                               | 25.3                               | 18.2       | 0.2                     | 99.3         |
| 12              | 16.1       | 35.7                               | 25.3                               | 20.9       | 0.3                     | 98.3         |
| 13              | 9.9        | 24.7                               | 34.6                               | 29.1       | 0.4                     | 98.8         |
| 14              | 10.9       | 31.7                               | 33.9                               | 22.2       | 0.2                     | 98.9         |
| 15              | 10.5       | 28.8                               | 35.3                               | 23.6       | 0.3                     | 98.5         |
| 16              | 16.6       | 32.3                               | 36.3                               | 14.4       | 0.2                     | 99.8         |
| 17              | 16.2       | 35.4                               | 28.3                               | 19.1       | 0.5                     | 99.5         |
| 18              | 12.7       | 28.8                               | 21.9                               | 28.7       | 0.3                     | 92.5         |
| 19              | 2.3        | 22.6                               | 36.8                               | 36.8       | 0.3                     | 98.8         |
| 20              | 11.8       | 22.8                               | 25.3                               | 33.1       | 1.9                     | 94.8         |
| 21              | 9.0        | 24.8                               | 40.0                               | 24.2       | 0.3                     | 98.3         |
| 22              | 8.2        | 19.4                               | 43.2                               | 27.7       | 0.4                     | 99.0         |
| 23              | 11.8       | 26.2                               | 39.0                               | 21.8       | 0.4                     | 99.2         |
| 24              | 7.8        | 10.9                               | 56.5                               | 23.0       | 0.2                     | 98.4         |
| 25              | 2.4        | 4.9                                | 45.0                               | 45.0       | 0.5                     | 97.8         |
| 26              | 16.3       | 22.6                               | 19.1                               | 24.4       | 0.3                     | 82.6         |
| 27              | 10.5       | 18.9                               | 19.8                               | 36.2       | 1.9                     | 87.4         |
| 28              | 4.0        | 8.5                                | 45.4                               | 33.1       | 0.4                     | 91.3         |
| 29              | 13.9       | 38.6                               | 27.9                               | 18.7       | 0.3                     | 99.3         |
| 30              | 12.3       | 29.4                               | 36.1                               | 22.0       | 0.3                     | 100.0        |
| 31              | 11.2       | 21.7                               | 46.5                               | 19.5       | 0.2                     | 99.0         |
| 32              | 8.2        | 18.6                               | 47.2                               | 25.6       | 0.2                     | 99.6         |
| 33              | 7.8        | 21.5                               | 36.3                               | 32.6       | 0.9                     | 99.1         |
| 34              | 9.8        | 25.3                               | 33.7                               | 29.8       | 0.4                     | 98.9         |
| 35              | 10.0       | 21.6                               | 44.0                               | 24.2       | 0.3                     | 100.0        |
| 36              | 11.7       | 30.0                               | 36.0                               | 21.2       | 0.3                     | 99.2         |
| 37              | 6.5        | 13.8                               | 50.9                               | 27.1       | 0.4                     | 98.7         |
| 38              | 8.9        | 21.7                               | 46.4                               | 21.5       | 0.2                     | 98.7         |
| 39              | 11.1       | 21.0                               | 47.5                               | 19.4       | 0.3                     | 99.3         |
| 40              | 6.3        | 10.1                               | 48.1                               | 34.5       | 0.3                     | 99.3         |
| 41              | 13.4       | 29.5                               | 39.3                               | 16.8       | 0.3                     | 99.3         |
| 42              | 13.5       | 25.1                               | 41.5                               | 20.0       | 0.0                     | 100.0        |
| 43              | 12.0       | 27.7                               | 35.6                               | 24.0       | 0.4                     | 99.7         |
| 44              | 10.5       | 23.0                               | 44.5                               | 20.8       | 0.3                     | 99.0         |
| 45              | 12.3       | 26.9                               | 41.1                               | 18.9       | 0.0                     | 99.2         |
| 46              | 3.6        | 9.0                                | 50.4                               | 35.4       | 0.4                     | 98.7         |
| 47              | 11.8       | 33.8                               | 31.6                               | 21.8       | 0.3                     | 99.3         |
| 48              | 13.8       | 34.6                               | 32.5                               | 18.7       | 0.4                     | 100.0        |



**SUPPLEMENTARY TABLE 3**

| <b>BRK14-7a</b> |            | <b>Type 2</b>                      |                                    |            |                         |              |
|-----------------|------------|------------------------------------|------------------------------------|------------|-------------------------|--------------|
| <b>Analysis</b> | <b>MgO</b> | <b>Al<sub>2</sub>O<sub>3</sub></b> | <b>Cr<sub>2</sub>O<sub>3</sub></b> | <b>FeO</b> | <b>TiO<sub>2</sub>*</b> | <b>Total</b> |
| 1               | 15.0       | 7.6                                | 62.3                               | 13.7       | 0.3                     | 98.9         |
| 2               | 11.5       | 9.9                                | 61.1                               | 17.3       | 0.2                     | 99.8         |
| 3               | 6.3        | 12.2                               | 44.6                               | 34.7       | 0.1                     | 98.0         |
| 4               | 8.9        | 12.3                               | 56.3                               | 21.0       | 0.4                     | 98.9         |
| 5               | 9.6        | 23.6                               | 44.3                               | 20.6       | 0.4                     | 98.6         |
| 6               | 11.7       | 21.0                               | 46.2                               | 20.0       | 0.2                     | 99.2         |
| 7               | 11.4       | 20.5                               | 48.4                               | 18.2       | 0.2                     | 98.7         |
| 8               | 14.7       | 14.8                               | 50.6                               | 17.6       | 1.1                     | 98.8         |
| 9               | 8.6        | 12.6                               | 50.7                               | 26.3       | 0.4                     | 98.6         |
| 10              | 9.9        | 23.0                               | 39.2                               | 26.2       | 0.5                     | 98.8         |
| 11              | 8.0        | 17.3                               | 50.3                               | 24.5       | 0.0                     | 100.0        |
| 12              | 9.7        | 10.0                               | 43.2                               | 32.0       | 3.8                     | 98.6         |
| 13              | 8.8        | 26.0                               | 33.4                               | 29.6       | 0.3                     | 98.1         |
| 14              | 14.7       | 30.6                               | 35.4                               | 18.0       | 0.4                     | 99.1         |
| 15              | 18.5       | 40.4                               | 26.9                               | 13.7       | 0.2                     | 99.7         |
| 16              | 12.0       | 16.8                               | 46.2                               | 22.7       | 1.3                     | 99.0         |
| 17              | 8.3        | 9.1                                | 60.2                               | 21.1       | 0.4                     | 99.0         |
| 18              | 16.0       | 36.6                               | 26.7                               | 19.4       | 0.4                     | 99.1         |
| 19              | 14.0       | 39.5                               | 24.1                               | 21.7       | 0.2                     | 99.6         |
| 20              | 7.4        | 8.2                                | 61.4                               | 21.8       | 0.4                     | 99.1         |
| 21              | 11.8       | 21.6                               | 49.2                               | 16.4       | 0.2                     | 99.2         |
| 22              | 16.7       | 34.4                               | 30.9                               | 17.5       | 0.2                     | 99.8         |
| 23              | 8.9        | 22.8                               | 38.9                               | 27.7       | 0.6                     | 99.0         |
| 24              | 10.0       | 13.2                               | 42.6                               | 30.4       | 2.8                     | 99.0         |
| 25              | 17.4       | 48.3                               | 18.0                               | 15.6       | 0.1                     | 99.4         |
| 26              | 16.6       | 31.2                               | 33.3                               | 17.5       | 0.3                     | 99.0         |
| 27              | 13.8       | 35.4                               | 30.0                               | 19.7       | 0.2                     | 99.0         |
| 28              | 9.6        | 11.5                               | 52.5                               | 23.8       | 1.4                     | 98.7         |
| 29              | 9.6        | 15.2                               | 44.5                               | 28.5       | 1.1                     | 98.9         |
| 30              | 14.2       | 36.8                               | 27.9                               | 18.6       | 0.3                     | 97.8         |
| 31              | 11.0       | 9.9                                | 40.9                               | 31.3       | 5.3                     | 98.4         |
| 32              | 9.5        | 11.7                               | 57.2                               | 20.3       | 0.3                     | 98.9         |
| 33              | 8.4        | 18.1                               | 46.0                               | 27.1       | 0.0                     | 99.6         |
| 34              | 7.0        | 14.6                               | 45.2                               | 31.3       | 0.2                     | 98.3         |
| 35              | 7.3        | 16.3                               | 45.8                               | 29.1       | 0.3                     | 98.7         |

\* - Below detection

Supplementary Table 5 - U-Pb geochronology results of gabbroic clasts

| Analysis         | U<br>(ppm) | Isotopic Ratios    |            |                    |            |                    |            |           | Apparent Ages      |     |                    |     |                    |    | Best<br>Age | ±<br>Ma |
|------------------|------------|--------------------|------------|--------------------|------------|--------------------|------------|-----------|--------------------|-----|--------------------|-----|--------------------|----|-------------|---------|
|                  |            | <sup>207</sup> Pb* | ±          | <sup>207</sup> Pb* | ±          | <sup>206</sup> Pb* | ±          | error     | <sup>206</sup> Pb* | ±   | <sup>207</sup> Pb* | ±   | <sup>206</sup> Pb* | ±  |             |         |
|                  |            | <sup>206</sup> Pb* | (%)        | <sup>235</sup> U   | (%)        | <sup>238</sup> U   | (%)        | corr.     | <sup>238</sup> U   | Ma  | <sup>235</sup> U   | Ma  | <sup>207</sup> Pb* | Ma |             |         |
| BRNF15-K58B_1_13 | 120        | 0.0516             | 2.81007752 | 0.194              | 4.3814433  | 0.02676            | 3.55007474 | 0.13603   | 170.2              | 6   | 178.7              | 7   | 310                | 60 | 170         | 6       |
| BRNF15-K58B_1_17 | 77         | 0.0522             | 4.98084291 | 0.193              | 5.69948187 | 0.02745            | 3.46083789 | 0.060641  | 174.5              | 6   | 176                | 9.5 | 190                | 85 | 175         | 6       |
| BRNF15-K58B_1_11 | 199        | 0.0535             | 2.42990654 | 0.2073             | 4.10033767 | 0.02779            | 3.5984167  | 0.17721   | 176.7              | 6.5 | 192.1              | 7   | 351                | 50 | 177         | 7       |
| BRNF15-K58B_1_3  | 42         | 0.0517             | 5.60928433 | 0.196              | 6.12244898 | 0.02796            | 3.75536481 | -0.10999  | 177.7              | 6.5 | 178                | 10  | 150                | 95 | 178         | 7       |
| BRNF15-K58B_1_15 | 132        | 0.0503             | 3.18091451 | 0.191              | 4.45026178 | 0.02796            | 3.57653791 | 0.29468   | 177.7              | 6   | 178.7              | 7   | 210                | 60 | 178         | 6       |
| BRNF15-K58B_1_7  | 58         | 0.0509             | 4.22396857 | 0.208              | 5.28846154 | 0.02797            | 3.57525921 | 0.25564   | 177.8              | 6.5 | 190                | 9.5 | 230                | 80 | 178         | 7       |
| BRNF15-K58B_1_14 | 71         | 0.0507             | 4.63510848 | 0.191              | 5.7591623  | 0.02817            | 3.72736954 | 0.35814   | 179.1              | 6.5 | 175                | 9   | 150                | 85 | 179         | 7       |
| BRNF15-K58B_1_5  | 63         | 0.0499             | 3.80761523 | 0.193              | 4.92227979 | 0.02835            | 3.52733686 | -0.002178 | 180.2              | 6.5 | 180                | 8   | 210                | 70 | 180         | 7       |
| BRNF15-K58B_1_12 | 85         | 0.0493             | 3.54969574 | 0.189              | 5.02645503 | 0.02855            | 3.50262697 | 0.33796   | 181.4              | 6.5 | 177                | 8   | 170                | 65 | 181         | 7       |
| BRNF15-K58B_1_10 | 73         | 0.0471             | 4.14012739 | 0.187              | 5.34759358 | 0.02868            | 3.66108787 | 0.17074   | 182.2              | 6.5 | 175                | 8.5 | 100                | 75 | 182         | 7       |
| BRNF15-K58B_1_19 | 97         | 0.0497             | 3.31991952 | 0.192              | 4.6875     | 0.02873            | 3.65471632 | -0.15442  | 182.5              | 6.5 | 176.8              | 7.5 | 170                | 65 | 183         | 7       |
| BRNF15-K58B_1_8  | 82         | 0.0471             | 3.60934183 | 0.186              | 4.83870968 | 0.02896            | 3.62569061 | 0.21703   | 184                | 6.5 | 172                | 8   | 80                 | 65 | 184         | 7       |
| BRNF15-K58B_1_18 | 88         | 0.0551             | 6.44283122 | 0.28               | 25         | 0.02904            | 3.61570248 | 0.055651  | 184.5              | 6.5 | 192                | 8.5 | 270                | 75 | 185         | 7       |
| BRNF15-K58B_1_6  | 69         | 0.0496             | 4.33467742 | 0.204              | 5.39215686 | 0.02906            | 3.61321404 | 0.017747  | 184.6              | 6.5 | 184                | 9   | 160                | 75 | 185         | 7       |
| BRNF15-K58B_1_9  | 50         | 0.0467             | 4.49678801 | 0.184              | 5.70652174 | 0.02913            | 3.77617576 | 0.28231   | 185.1              | 7   | 169                | 9   | 30                 | 80 | 185         | 7       |
| BRNF15-K58B_1_20 | 60         | 0.051              | 4.01960784 | 0.198              | 5.55555556 | 0.02916            | 3.60082305 | 0.36568   | 185.2              | 6.5 | 183                | 9   | 220                | 80 | 185         | 7       |
| BRNF15-K58B_1_2  | 73         | 0.0518             | 4.82625483 | 0.21               | 5.71428571 | 0.02982            | 3.52112676 | -0.11295  | 189.4              | 6.5 | 190                | 9.5 | 180                | 80 | 189         | 7       |

| Analysis         | U<br>(ppm) | Isotopic Ratios    |     |                    |      |                    |     |         | Apparent Ages      |     |                    |      |                    |      | Best<br>Age | ±<br>Ma |
|------------------|------------|--------------------|-----|--------------------|------|--------------------|-----|---------|--------------------|-----|--------------------|------|--------------------|------|-------------|---------|
|                  |            | <sup>207</sup> Pb* | ±   | <sup>207</sup> Pb* | ±    | <sup>206</sup> Pb* | ±   | error   | <sup>206</sup> Pb* | ±   | <sup>207</sup> Pb* | ±    | <sup>206</sup> Pb* | ±    |             |         |
|                  |            | <sup>206</sup> Pb* | (%) | <sup>235</sup> U   | (%)  | <sup>238</sup> U   | (%) | corr.   | <sup>238</sup> U   | Ma  | <sup>235</sup> U   | Ma   | <sup>207</sup> Pb* | Ma   |             |         |
| BRNF15-K58B_2_20 | 318        | 0.0494             | 2.3 | 0.1954             | 4.1  | 0.02803            | 3.7 | 0.2569  | 178.2              | 6.5 | 180.7              | 7    | 166                | 48   | 178         | 7       |
| BRNF15-K58B_2_19 | 401        | 0.0497             | 2.2 | 0.239              | 15.3 | 0.02899            | 3.6 | 0.0541  | 184.2              | 6.5 | 187.8              | 3.45 | 168                | 44.5 | 184         | 7       |
| BRNF15-K58B_2_13 | 224        | 0.0499             | 2.6 | 0.1983             | 4.0  | 0.0295             | 3.4 | 0.1818  | 187.4              | 6.5 | 183.1              | 7    | 184                | 50   | 187         | 7       |
| BRNF15-K58B_2_17 | 103        | 0.0505             | 3.0 | 0.213              | 4.5  | 0.03009            | 3.7 | 0.2764  | 191.1              | 7   | 195.1              | 8    | 190                | 60   | 191         | 7       |
| BRNF15-K58B_2_4  | 141        | 0.0508             | 3.2 | 0.21               | 4.3  | 0.03064            | 3.4 | -0.0175 | 194.5              | 6.5 | 192.1              | 7.5  | 200                | 60   | 195         | 7       |
| BRNF15-K58B_2_12 | 138        | 0.0523             | 3.0 | 0.224              | 4.2  | 0.03106            | 3.5 | 0.1198  | 197.1              | 7   | 203.7              | 8    | 260                | 60   | 197         | 7       |
| BRNF15-K58B_2_18 | 319        | 0.0499             | 2.2 | 0.2175             | 3.9  | 0.03115            | 3.5 | 0.1664  | 197.7              | 7   | 200.1              | 7    | 188                | 45.5 | 198         | 7       |
| BRNF15-K58B_2_7  | 373        | 0.0509             | 2.1 | 0.2178             | 3.9  | 0.03125            | 3.5 | 0.4110  | 198.3              | 7   | 199.7              | 7    | 225                | 43.5 | 198         | 7       |
| BRNF15-K58B_2_14 | 461        | 0.05               | 1.9 | 0.2173             | 3.9  | 0.0314             | 3.5 | 0.3729  | 199.3              | 7   | 199.4              | 7    | 199                | 40.5 | 199         | 7       |
| BRNF15-K58B_2_6  | 160        | 0.0539             | 2.6 | 0.229              | 4.1  | 0.0315             | 3.5 | 0.0128  | 199.9              | 7   | 209.7              | 7.5  | 330                | 55   | 200         | 7       |
| BRNF15-K58B_2_16 | 117        | 0.0544             | 3.0 | 0.236              | 4.4  | 0.03152            | 3.5 | 0.1283  | 200                | 7   | 214                | 8.5  | 330                | 60   | 200         | 7       |
| BRNF15-K58B_2_10 | 231        | 0.0505             | 2.3 | 0.2176             | 4.1  | 0.03172            | 3.5 | 0.3864  | 201.3              | 7   | 199.2              | 7.5  | 228                | 47.5 | 201         | 7       |
| BRNF15-K58B_2_3  | 290        | 0.0483             | 2.2 | 0.2125             | 4.0  | 0.03204            | 3.4 | 0.3514  | 203.3              | 6.5 | 195.9              | 7    | 123                | 43   | 203         | 7       |
| BRNF15-K58B_2_8  | 313        | 0.0514             | 2.0 | 0.2265             | 4.0  | 0.03231            | 3.4 | 0.0581  | 205                | 7   | 206.8              | 7.5  | 243                | 42   | 205         | 7       |
| BRNF15-K58B_2_5  | 204        | 0.0509             | 2.2 | 0.2239             | 4.0  | 0.0324             | 3.5 | 0.2608  | 205.5              | 7   | 205.4              | 7.5  | 235                | 46.5 | 206         | 7       |
| BRNF15-K58B_2_11 | 173        | 0.0508             | 3.4 | 0.225              | 4.7  | 0.03242            | 3.4 | 0.0318  | 205.7              | 7   | 205                | 8.5  | 170                | 60   | 206         | 7       |
| BRNF15-K58B_2_1  | 403        | 0.0496             | 1.9 | 0.2189             | 3.7  | 0.03276            | 3.4 | 0.0788  | 207.8              | 7   | 200.8              | 7    | 178                | 40   | 208         | 7       |

| Analysis        | U<br>(ppm) | Isotopic Ratios    |     |                    |     |                    |     |          | Apparent Ages      |     |                    |     |                    |      | Best<br>Age | ±<br>Ma |
|-----------------|------------|--------------------|-----|--------------------|-----|--------------------|-----|----------|--------------------|-----|--------------------|-----|--------------------|------|-------------|---------|
|                 |            | <sup>207</sup> Pb* | ±   | <sup>207</sup> Pb* | ±   | <sup>206</sup> Pb* | ±   | error    | <sup>206</sup> Pb* | ±   | <sup>207</sup> Pb* | ±   | <sup>206</sup> Pb* | ±    |             |         |
|                 |            | <sup>206</sup> Pb* | (%) | <sup>235</sup> U   | (%) | <sup>238</sup> U   | (%) | corr.    | <sup>238</sup> U   | Ma  | <sup>235</sup> U   | Ma  | <sup>207</sup> Pb* | Ma   |             |         |
| BRJR13-K8b_1_16 | 170        | 0.0524             | 2.7 | 0.211              | 4.3 | 0.0288             | 3.6 | 0.31753  | 183                | 6.5 | 193.1              | 7.5 | 264                | 55   | 183         | 7       |
| BRJR13-K8b_1_3  | 417        | 0.0532             | 1.8 | 0.219              | 3.9 | 0.02928            | 3.6 | 0.35409  | 186                | 6.5 | 200.8              | 7   | 317                | 39.5 | 186         | 7       |
| BRJR13-K8b_1_7  | 305        | 0.0508             | 2.2 | 0.2028             | 3.9 | 0.02937            | 3.4 | 0.10082  | 186.6              | 6.5 | 187.6              | 7   | 222                | 46   | 187         | 7       |
| BRJR13-K8b_1_12 | 62         | 0.0474             | 4.0 | 0.192              | 5.2 | 0.02949            | 3.6 | 0.1696   | 187.3              | 6.5 | 178                | 8.5 | 110                | 70   | 187         | 7       |
| BRJR13-K8b_1_17 | 170        | 0.0527             | 2.8 | 0.211              | 4.3 | 0.02972            | 3.5 | 0.14739  | 188.8              | 6.5 | 194.5              | 7.5 | 287                | 55   | 189         | 7       |
| BRJR13-K8b_1_2  | 314        | 0.0501             | 2.2 | 0.2054             | 3.9 | 0.02976            | 3.5 | 0.29429  | 189                | 6.5 | 190.5              | 7   | 191                | 46   | 189         | 7       |
| BRJR13-K8b_1_10 | 193        | 0.0492             | 2.8 | 0.206              | 4.4 | 0.03021            | 3.5 | 0.10823  | 191.8              | 6.5 | 190.3              | 7.5 | 143                | 55   | 192         | 7       |
| BRJR13-K8b_1_11 | 93         | 0.0542             | 3.8 | 0.224              | 5.1 | 0.03021            | 3.6 | 0.1046   | 191.8              | 7   | 203                | 9.5 | 300                | 70   | 192         | 7       |
| BRJR13-K8b_1_6  | 720        | 0.0503             | 1.7 | 0.2103             | 3.8 | 0.03022            | 3.5 | 0.45598  | 191.9              | 6.5 | 193.6              | 6.5 | 199                | 36   | 192         | 7       |
| BRJR13-K8b_1_8  | 298        | 0.0501             | 2.4 | 0.2108             | 4.0 | 0.03047            | 3.4 | 0.068418 | 193.5              | 6.5 | 193.6              | 7   | 184                | 47   | 194         | 7       |
| BRJR13-K8b_1_15 | 267        | 0.0516             | 2.3 | 0.2139             | 4.2 | 0.03078            | 3.6 | 0.28652  | 195.4              | 6.5 | 197.7              | 7.5 | 265                | 46   | 195         | 7       |

Supplementary Table 6 - U-Pb geochronology of Ruby Batholith plutons of the Ruby terrane

| Jim River Pluton |      |                    |     |                    |     |                    |     |         |                    |      |                    |      |                    |      |     |      |
|------------------|------|--------------------|-----|--------------------|-----|--------------------|-----|---------|--------------------|------|--------------------|------|--------------------|------|-----|------|
| Analysis         | U    | Isotopic Ratios    |     |                    |     |                    |     |         | Apparent Ages      |      |                    |      |                    |      |     | Best |
|                  |      | <sup>207</sup> Pb* | ±   | <sup>207</sup> Pb* | ±   | <sup>206</sup> Pb* | ±   | error   | <sup>206</sup> Pb* | ±    | <sup>207</sup> Pb* | ±    | <sup>206</sup> Pb* | ±    | Age | ±    |
|                  |      | <sup>206</sup> Pb* | (%) | <sup>235</sup> U   | (%) | <sup>238</sup> U   | (%) |         | <sup>238</sup> U   | Ma   | <sup>235</sup> U   | Ma   | <sup>207</sup> Pb* | Ma   |     |      |
| BRHR14_2_2       | 403  | 0.0486             | 3.6 | 0.1093             | 3.2 | 0.0164             | 3.1 | 0.0848  | 105.4              | 2.35 | 105.1              | 3.2  | 129                | 47   | 105 | 3    |
| BRHR14_2_11      | 108  | 0.0510             | 5.8 | 0.1160             | 5.2 | 0.0166             | 3.3 | -0.0439 | 105.8              | 2.7  | 110                | 5.5  | 260                | 95   | 106 | 4    |
| BRHR14_2_12      | 204  | 0.0501             | 4.3 | 0.1114             | 3.8 | 0.0166             | 3.3 | 0.0532  | 106.2              | 2.45 | 107.4              | 3.95 | 170                | 65   | 106 | 3    |
| BRHR14_2_13      | 833  | 0.0458             | 3.3 | 0.1063             | 3.0 | 0.0167             | 3.0 | 0.4723  | 107.1              | 2.35 | 102.4              | 2.9  | 16                 | 35   | 107 | 3    |
| BRHR14_2_6       | 384  | 0.0483             | 3.5 | 0.1106             | 3.3 | 0.0168             | 3.3 | 0.4704  | 107.6              | 2.45 | 106.2              | 3.3  | 136                | 46.5 | 107 | 3    |
| BRHR14_2_9       | 248  | 0.0462             | 4.1 | 0.1050             | 3.8 | 0.0169             | 3.3 | 0.2136  | 107.8              | 2.45 | 101.6              | 3.7  | 40                 | 55   | 108 | 3    |
| BRHR14_2_8       | 226  | 0.0491             | 4.4 | 0.1115             | 3.8 | 0.0169             | 3.3 | -0.0053 | 108.1              | 2.55 | 106.8              | 3.9  | 150                | 65   | 108 | 3    |
| BRHR14_2_19      | 211  | 0.0466             | 4.1 | 0.1092             | 3.5 | 0.0169             | 3.2 | 0.1262  | 108.2              | 2.6  | 106.1              | 3.5  | 90                 | 55   | 108 | 4    |
| BRHR14_2_1       | 1677 | 0.0478             | 3.0 | 0.1117             | 2.6 | 0.0169             | 3.0 | 0.0062  | 109                | 2.35 | 107.4              | 2.7  | 101                | 31   | 108 | 3    |
| BRHR14_2_5       | 211  | 0.0493             | 4.4 | 0.1153             | 3.9 | 0.0171             | 3.2 | 0.1444  | 109.6              | 2.5  | 110.2              | 4.15 | 130                | 60   | 109 | 3    |
| BRHR14_2_4       | 259  | 0.0469             | 3.8 | 0.1090             | 3.6 | 0.0171             | 3.2 | -0.0633 | 110                | 2.55 | 104.8              | 3.55 | 60                 | 55   | 110 | 4    |
| BRHR14_2_15      | 182  | 0.0470             | 4.0 | 0.1096             | 3.9 | 0.0172             | 3.2 | 0.3761  | 109.7              | 2.55 | 105.1              | 3.9  | 80                 | 55   | 110 | 4    |
| BRHR14_2_16      | 1340 | 0.0481             | 3.1 | 0.1105             | 3.2 | 0.0172             | 3.2 | -0.2333 | 109.4              | 2.5  | 106.3              | 3.25 | 117                | 41   | 110 | 3    |
| BRHR14_2_10      | 210  | 0.0497             | 4.2 | 0.1146             | 3.7 | 0.0172             | 3.2 | 0.1020  | 110.1              | 2.55 | 109.7              | 3.9  | 170                | 60   | 110 | 4    |
| BRHR14_2_20      | 393  | 0.0454             | 3.4 | 0.1059             | 3.1 | 0.0173             | 3.2 | 0.0667  | 110.4              | 2.5  | 102                | 3.05 | 13                 | 42   | 110 | 3    |
| BRHR14_2_14      | 512  | 0.0465             | 3.3 | 0.1112             | 3.0 | 0.0175             | 3.2 | 0.1584  | 111.5              | 2.5  | 106.9              | 3.05 | 58                 | 41.5 | 112 | 4    |
| BRHR14_2_3       | 162  | 0.0477             | 4.4 | 0.1178             | 4.7 | 0.0175             | 3.4 | 0.0595  | 110                | 2.7  | 112.5              | 4.95 | 170                | 80   | 112 | 4    |
| BRHR14_2_18      | 168  | 0.0460             | 4.5 | 0.1094             | 4.2 | 0.0177             | 3.1 | 0.0905  | 112.8              | 2.6  | 104.8              | 4.2  | 30                 | 65   | 113 | 4    |
| BRHR14_2_17      | 250  | 0.0485             | 3.6 | 0.1187             | 3.3 | 0.0180             | 3.3 | 0.3243  | 115.2              | 2.85 | 114.2              | 3.65 | 127                | 48   | 115 | 4    |
| Bonanza Pluton   |      |                    |     |                    |     |                    |     |         |                    |      |                    |      |                    |      |     |      |
| Analysis         | U    | Isotopic Ratios    |     |                    |     |                    |     |         | Apparent Ages      |      |                    |      |                    |      |     | Best |
|                  |      | <sup>207</sup> Pb* | ±   | <sup>207</sup> Pb* | ±   | <sup>206</sup> Pb* | ±   | error   | <sup>206</sup> Pb* | ±    | <sup>207</sup> Pb* | ±    | <sup>206</sup> Pb* | ±    | Age | ±    |
|                  |      | <sup>206</sup> Pb* | (%) | <sup>235</sup> U   | (%) | <sup>238</sup> U   | (%) |         | <sup>238</sup> U   | Ma   | <sup>235</sup> U   | Ma   | <sup>207</sup> Pb* | Ma   |     |      |
| BRHR14_7_10      | 466  | 0.05               | 2.5 | 0.1088             | 3.2 | 0.01654            | 2.3 | 0.1919  | 105.8              | 2.4  | 104.7              | 3.2  | 181                | 50   | 106 | 2    |
| BRHR14_7_12      | 2819 | 0.0551             | 1.5 | 0.1261             | 2.6 | 0.01704            | 2.3 | 0.4866  | 108.9              | 2.45 | 120.5              | 2.95 | 401                | 32   | 109 | 2    |
| BRHR14_7_17      | 1228 | 0.0489             | 1.7 | 0.1119             | 2.9 | 0.01722            | 2.2 | 0.4591  | 110.1              | 2.45 | 107.6              | 2.9  | 148                | 36.5 | 110 | 2    |
| BRHR14_7_1       | 907  | 0.0487             | 1.8 | 0.1139             | 2.9 | 0.01725            | 2.3 | 0.1190  | 110.2              | 2.45 | 109.4              | 3    | 129                | 36.5 | 110 | 2    |
| BRHR14_7_7       | 1878 | 0.0539             | 1.8 | 0.1274             | 2.9 | 0.01741            | 2.2 | 0.3932  | 111.2              | 2.45 | 122.1              | 3.35 | 358                | 40   | 111 | 2    |
| BRHR14_7_14      | 3075 | 0.0524             | 1.4 | 0.1242             | 2.7 | 0.01752            | 2.2 | 0.4536  | 111.9              | 2.45 | 118.8              | 2.95 | 300                | 33   | 112 | 2    |
| BRHR14_7_2       | 1795 | 0.0475             | 1.5 | 0.1142             | 2.7 | 0.01766            | 2.2 | 0.5364  | 112.8              | 2.45 | 109.7              | 2.8  | 81                 | 30.5 | 113 | 2    |
| BRHR14_7_4       | 1745 | 0.0488             | 1.6 | 0.1188             | 2.7 | 0.01801            | 2.2 | 0.1993  | 115.1              | 2.45 | 113.9              | 2.9  | 138                | 32   | 115 | 2    |
| BRHR14_7_18      | 990  | 0.0487             | 1.6 | 0.1214             | 2.7 | 0.01829            | 2.2 | 0.3851  | 116.8              | 2.6  | 116.3              | 3    | 142                | 34.5 | 117 | 3    |
| BRHR14_7_20      | 2346 | 0.0529             | 1.6 | 0.1282             | 2.7 | 0.01829            | 2.2 | 0.3521  | 116.8              | 2.6  | 122.3              | 3.05 | 300                | 34.5 | 117 | 3    |
| Bonanza Pluton   |      |                    |     |                    |     |                    |     |         |                    |      |                    |      |                    |      |     |      |
| Analysis         | U    | Isotopic Ratios    |     |                    |     |                    |     |         | Apparent Ages      |      |                    |      |                    |      |     | Best |
|                  |      | <sup>207</sup> Pb* | ±   | <sup>207</sup> Pb* | ±   | <sup>206</sup> Pb* | ±   | error   | <sup>206</sup> Pb* | ±    | <sup>207</sup> Pb* | ±    | <sup>206</sup> Pb* | ±    | Age | ±    |
|                  |      | <sup>206</sup> Pb* | (%) | <sup>235</sup> U   | (%) | <sup>238</sup> U   | (%) |         | <sup>238</sup> U   | Ma   | <sup>235</sup> U   | Ma   | <sup>207</sup> Pb* | Ma   |     |      |
| BRHR14_8_17      | 3393 | 0.0490             | 1.3 | 0.112              | 2.6 | 0.0166             | 2.2 | 0.6827  | 105.9              | 2.35 | 108                | 2.75 | 144                | 29   | 106 | 2    |
| BRHR14_8_16      | 2356 | 0.0686             | 2.0 | 0.1592             | 3.1 | 0.0167             | 2.2 | 0.5062  | 106.6              | 2.3  | 150.8              | 4.3  | 846                | 44.5 | 107 | 2    |
| BRHR14_8_14      | 2788 | 0.0529             | 1.6 | 0.1230             | 2.7 | 0.0168             | 2.2 | 0.4062  | 107.5              | 2.3  | 117.7              | 3.05 | 311                | 35   | 108 | 2    |
| BRHR14_8_10      | 1478 | 0.0521             | 6.7 | 0.1220             | 7.4 | 0.0170             | 2.2 | -0.0243 | 108.7              | 2.4  | 109.4              | 1.5  | 133                | 26   | 109 | 2    |
| BRHR14_8_3       | 3346 | 0.0526             | 1.4 | 0.1225             | 2.6 | 0.0170             | 2.2 | 0.2559  | 108.9              | 2.4  | 117.2              | 2.9  | 298                | 31   | 109 | 2    |
| BRHR14_8_15      | 1124 | 0.0493             | 1.7 | 0.1180             | 2.8 | 0.0172             | 2.2 | 0.2905  | 109.7              | 2.5  | 113.1              | 2.95 | 159                | 37   | 110 | 2    |
| BRHR14_8_13      | 1614 | 0.0484             | 1.5 | 0.1141             | 2.8 | 0.0172             | 2.2 | -0.0162 | 109.8              | 2.5  | 109.6              | 2.9  | 121                | 33   | 110 | 2    |
| BRHR14_8_5       | 2084 | 0.0484             | 1.3 | 0.1150             | 2.7 | 0.0173             | 2.2 | 0.5779  | 110.7              | 2.5  | 110.4              | 2.8  | 126                | 30   | 111 | 2    |
| BRHR14_8_8       | 1675 | 0.0487             | 1.5 | 0.1156             | 2.6 | 0.0174             | 2.2 | 0.3862  | 110.9              | 2.4  | 111                | 2.75 | 138                | 32   | 111 | 2    |
| BRHR14_8_12      | 1347 | 0.0486             | 1.4 | 0.1170             | 2.7 | 0.0174             | 2.2 | 0.4883  | 111.1              | 2.4  | 112.3              | 2.85 | 127                | 31   | 111 | 2    |
| BRHR14_8_2       | 3113 | 0.0600             | 1.9 | 0.1443             | 2.9 | 0.0177             | 2.3 | 0.3887  | 113.2              | 2.5  | 136.7              | 3.75 | 600                | 43   | 113 | 3    |
| BRHR14_8_11      | 2147 | 0.0584             | 1.7 | 0.1448             | 2.9 | 0.0180             | 2.2 | 0.5192  | 114.9              | 2.5  | 137.1              | 3.75 | 535                | 38   | 115 | 3    |
| BRHR14_8_18      | 1475 | 0.0481             | 1.5 | 0.1199             | 2.6 | 0.0180             | 2.2 | 0.5167  | 115.3              | 2.5  | 114.9              | 2.85 | 108                | 30   | 115 | 3    |
| BRHR14_8_6       | 844  | 0.0475             | 1.8 | 0.1160             | 2.9 | 0.0181             | 2.3 | 0.4497  | 115.8              | 2.7  | 111.3              | 3.05 | 82                 | 35   | 116 | 3    |

Supplementary Table 7 - Lu-Hf isotopic results from detrital and igneous zircons

## Yukon Koyukuk Sediments

## Type 1

| Sample         | $^{176}\text{Hf}/^{177}\text{Hf}$ | 2SE      | $^{176}\text{Lu}/^{177}\text{Hf}$ | 2SE      | $^{176}\text{Yb}/^{177}\text{Hf}$ | 2SE      | $^{178}\text{Hf}/^{177}\text{Hf}$ | 2SE      | $^{180}\text{Hf}/^{177}\text{Hf}$ | 2SE      | Age (Ma) | $^{176}\text{Hf}/^{177}\text{Hf}(i)$ | $\epsilon\text{HF}(0)$ | $\epsilon\text{HF}(i)$ | 2SE |
|----------------|-----------------------------------|----------|-----------------------------------|----------|-----------------------------------|----------|-----------------------------------|----------|-----------------------------------|----------|----------|--------------------------------------|------------------------|------------------------|-----|
| BRJR13-K8a_02  | 0.283038                          | 0.000043 | 0.002248                          | 0.000026 | 0.049620                          | 0.000640 | 1.467149                          | 0.000039 | 1.887050                          | 0.000170 | 195.3    | 0.283030                             | 9.0                    | 13.0                   | 1.5 |
| BRJR13-K8a_04  | 0.283032                          | 0.000032 | 0.001641                          | 0.000022 | 0.033670                          | 0.000520 | 1.467178                          | 0.000040 | 1.887100                          | 0.000120 | 196.3    | 0.283026                             | 8.7                    | 12.9                   | 1.1 |
| BRJR13-K8a_08  | 0.282602                          | 0.000042 | 0.000886                          | 0.000033 | 0.022850                          | 0.000990 | 1.467222                          | 0.000060 | 1.887000                          | 0.000130 | 108.8    | 0.282600                             | -6.5                   | -4.1                   | 1.5 |
| BRJR13-K8a_21  | 0.282974                          | 0.000029 | 0.001806                          | 0.000051 | 0.038600                          | 0.001300 | 1.467138                          | 0.000057 | 1.887190                          | 0.000100 | 218.0    | 0.282967                             | 6.7                    | 11.3                   | 1.0 |
| BRJR13-K8a_23  | 0.283027                          | 0.000042 | 0.002302                          | 0.000056 | 0.057500                          | 0.001400 | 1.467188                          | 0.000045 | 1.887220                          | 0.000130 | 175.2    | 0.283020                             | 8.6                    | 12.2                   | 1.5 |
| BRJR13-K8a_26  | 0.283040                          | 0.000042 | 0.001498                          | 0.000066 | 0.030500                          | 0.001500 | 1.467189                          | 0.000057 | 1.887190                          | 0.000130 | 217.0    | 0.283034                             | 9.0                    | 13.6                   | 1.5 |
| BRJR13-K8a_28  | 0.282996                          | 0.000040 | 0.001219                          | 0.000023 | 0.026430                          | 0.000550 | 1.467172                          | 0.000061 | 1.887180                          | 0.000130 | 238.4    | 0.282991                             | 7.5                    | 12.6                   | 1.4 |
| BRJR13-K8a_59  | 0.283117                          | 0.000036 | 0.002602                          | 0.000033 | 0.056970                          | 0.000700 | 1.467176                          | 0.000050 | 1.887020                          | 0.000150 | 170.2    | 0.283109                             | 11.7                   | 15.2                   | 1.3 |
| BRJR13-K8a_63  | 0.283030                          | 0.000045 | 0.001096                          | 0.000038 | 0.026800                          | 0.001000 | 1.467145                          | 0.000054 | 1.887229                          | 0.000098 | 197.2    | 0.283026                             | 8.7                    | 12.9                   | 1.6 |
| BRJR13-K8a_74  | 0.283058                          | 0.000032 | 0.000688                          | 0.000016 | 0.014890                          | 0.000300 | 1.467187                          | 0.000041 | 1.887080                          | 0.000120 | 198.2    | 0.283056                             | 9.7                    | 14.0                   | 1.1 |
| BRJR13-K8a_78  | 0.283050                          | 0.000020 | 0.001437                          | 0.000012 | 0.034140                          | 0.000220 | 1.467178                          | 0.000039 | 1.887041                          | 0.000097 | 202.9    | 0.283045                             | 9.4                    | 13.7                   | 0.7 |
| BRJR13-K8a_81  | 0.283053                          | 0.000029 | 0.001069                          | 0.000061 | 0.022900                          | 0.001300 | 1.467148                          | 0.000049 | 1.886890                          | 0.000100 | 187.3    | 0.283049                             | 9.5                    | 13.5                   | 1.0 |
| BRJR13-K8a_84  | 0.283100                          | 0.000025 | 0.001617                          | 0.000076 | 0.040300                          | 0.001700 | 1.467194                          | 0.000049 | 1.886975                          | 0.000074 | 192.1    | 0.283094                             | 11.1                   | 15.2                   | 0.9 |
| BRJR13-K8a_85  | 0.283085                          | 0.000035 | 0.000986                          | 0.000037 | 0.022200                          | 0.000830 | 1.467200                          | 0.000043 | 1.887003                          | 0.000076 | 207.1    | 0.283081                             | 10.6                   | 15.1                   | 1.2 |
| BRJR13-K8a_86  | 0.283079                          | 0.000024 | 0.000474                          | 0.000013 | 0.010000                          | 0.000240 | 1.467197                          | 0.000038 | 1.887040                          | 0.000100 | 219.4    | 0.283077                             | 10.4                   | 15.2                   | 0.8 |
| BRJR13-K8a_87  | 0.283048                          | 0.000028 | 0.001430                          | 0.000110 | 0.032600                          | 0.002400 | 1.467202                          | 0.000048 | 1.887070                          | 0.000100 | 167.3    | 0.283044                             | 9.3                    | 12.9                   | 1.0 |
| BRJR13-K8a_90  | 0.283073                          | 0.000027 | 0.000618                          | 0.000011 | 0.014260                          | 0.000280 | 1.467169                          | 0.000043 | 1.886878                          | 0.000097 | 207.1    | 0.283071                             | 10.2                   | 14.7                   | 1.0 |
| BRJR13-K8a_91  | 0.283065                          | 0.000028 | 0.000896                          | 0.000006 | 0.020760                          | 0.000250 | 1.467196                          | 0.000044 | 1.886980                          | 0.000110 | 236.8    | 0.283061                             | 9.9                    | 15.0                   | 1.0 |
| BRJR13-K8a_92  | 0.283064                          | 0.000034 | 0.000991                          | 0.000012 | 0.020340                          | 0.000170 | 1.467163                          | 0.000049 | 1.887000                          | 0.000110 | 166.0    | 0.283061                             | 9.9                    | 13.5                   | 1.2 |
| BRJR13-K8a_93  | 0.282784                          | 0.000035 | 0.001257                          | 0.000028 | 0.039820                          | 0.000540 | 1.467138                          | 0.000058 | 1.886906                          | 0.000092 | 403.1    | 0.282775                             | 0.0                    | 1.2                    | 8.6 |
| BRJR13-K8a_94  | 0.283082                          | 0.000026 | 0.001290                          | 0.000046 | 0.029500                          | 0.001100 | 1.467132                          | 0.000042 | 1.886920                          | 0.000100 | 195.8    | 0.283077                             | 10.5                   | 14.7                   | 0.9 |
| BRJR13-K8a_101 | 0.283035                          | 0.000034 | 0.002243                          | 0.000044 | 0.046990                          | 0.000500 | 1.467154                          | 0.000050 | 1.887010                          | 0.000120 | 209.2    | 0.283026                             | 8.8                    | 13.2                   | 1.2 |

## Type 2

| Sample         | $^{176}\text{Hf}/^{177}\text{Hf}$ | 2SE      | $^{176}\text{Lu}/^{177}\text{Hf}$ | 2SE      | $^{176}\text{Yb}/^{177}\text{Hf}$ | 2SE      | $^{178}\text{Hf}/^{177}\text{Hf}$ | 2SE      | $^{180}\text{Hf}/^{177}\text{Hf}$ | 2SE      | Age (Ma) | $^{176}\text{Hf}/^{177}\text{Hf}(i)$ | $\epsilon\text{HF}(0)$ | $\epsilon\text{HF}(i)$ | 2SE |
|----------------|-----------------------------------|----------|-----------------------------------|----------|-----------------------------------|----------|-----------------------------------|----------|-----------------------------------|----------|----------|--------------------------------------|------------------------|------------------------|-----|
| BRNF15-58a_02  | 0.282719                          | 0.000043 | 0.000458                          | 0.000017 | 0.011190                          | 0.000310 | 1.467044                          | 0.000040 | 1.886980                          | 0.000140 | 420.0    | 0.282715                             | -2.3                   | 6.9                    | 1.5 |
| BRNF15-58a_09  | 0.282716                          | 0.000032 | 0.000881                          | 0.000019 | 0.022610                          | 0.000690 | 1.467099                          | 0.000048 | 1.886930                          | 0.000140 | 425.4    | 0.282709                             | -2.4                   | 6.8                    | 1.1 |
| BRNF15-58a_14  | 0.282272                          | 0.000051 | 0.001263                          | 0.000045 | 0.042200                          | 0.001700 | 1.467083                          | 0.000065 | 1.887120                          | 0.000190 | 447.1    | 0.282261                             | -18.1                  | -8.6                   | 1.8 |
| BRNF15-58a_16  | 0.282812                          | 0.000036 | 0.002010                          | 0.000040 | 0.059800                          | 0.001900 | 1.467107                          | 0.000052 | 1.886950                          | 0.000120 | 412.9    | 0.282797                             | 1.0                    | 9.6                    | 1.3 |
| BRNF15-58a_18  | 0.282709                          | 0.000037 | 0.001506                          | 0.000027 | 0.043400                          | 0.001300 | 1.467089                          | 0.000047 | 1.886990                          | 0.000140 | 400.3    | 0.282698                             | -2.7                   | 5.8                    | 1.3 |
| BRNF15-58a_22  | 0.282281                          | 0.000036 | 0.002250                          | 0.000100 | 0.065300                          | 0.002300 | 1.467086                          | 0.000047 | 1.887120                          | 0.000120 | 453.1    | 0.282262                             | -17.8                  | -8.4                   | 1.3 |
| BRNF15-58a_23  | 0.282762                          | 0.000041 | 0.000995                          | 0.000048 | 0.026600                          | 0.001400 | 1.467094                          | 0.000036 | 1.887020                          | 0.000130 | 461.4    | 0.282753                             | -0.8                   | 9.2                    | 1.5 |
| BRNF15-58a_26  | 0.283091                          | 0.000038 | 0.000523                          | 0.000010 | 0.016180                          | 0.000490 | 1.467093                          | 0.000032 | 1.886950                          | 0.000120 | 167.5    | 0.283089                             | 10.8                   | 14.5                   | 1.3 |
| BRNF15-58a_29  | 0.283110                          | 0.000032 | 0.001111                          | 0.000070 | 0.034600                          | 0.002500 | 1.467127                          | 0.000037 | 1.887000                          | 0.000100 | 206.3    | 0.283106                             | 11.5                   | 15.9                   | 1.1 |
| BRNF15-58a_34  | 0.282601                          | 0.000036 | 0.000312                          | 0.000010 | 0.008380                          | 0.000470 | 1.467098                          | 0.000056 | 1.887160                          | 0.000130 | 428.9    | 0.282599                             | -6.5                   | 3.0                    | 1.3 |
| BRNF15-58a_36  | 0.282751                          | 0.000039 | 0.001576                          | 0.000083 | 0.037700                          | 0.002100 | 1.467018                          | 0.000051 | 1.887000                          | 0.000130 | 424.8    | 0.282739                             | -1.2                   | 7.8                    | 1.4 |
| BRNF15-58a_37  | 0.282778                          | 0.000030 | 0.001028                          | 0.000016 | 0.029780                          | 0.000550 | 1.467116                          | 0.000031 | 1.887070                          | 0.000110 | 453.2    | 0.282769                             | -0.2                   | 9.6                    | 1.1 |
| BRNF15-58a_49  | 0.283098                          | 0.000031 | 0.003241                          | 0.000055 | 0.091300                          | 0.001200 | 1.467118                          | 0.000045 | 1.886990                          | 0.000110 | 164.2    | 0.283088                             | 11.1                   | 14.4                   | 1.1 |
| BRNF15-58a_94  | 0.283068                          | 0.000034 | 0.000979                          | 0.000011 | 0.028740                          | 0.000580 | 1.467102                          | 0.000049 | 1.886860                          | 0.000130 | 191.2    | 0.283065                             | 10.0                   | 14.1                   | 1.2 |
| BRNF15-58a_101 | 0.282273                          | 0.000029 | 0.000614                          | 0.000009 | 0.016710                          | 0.000290 | 1.467100                          | 0.000046 | 1.886980                          | 0.000140 | 456.2    | 0.282268                             | -18.1                  | -8.1                   | 1.0 |

| Sample        | <sup>176</sup> Hf/ <sup>177</sup> Hf | 2SE      | <sup>176</sup> Lu/ <sup>177</sup> Hf | 2SE      | <sup>176</sup> Yb/ <sup>177</sup> Hf | 2SE      | <sup>178</sup> Hf/ <sup>177</sup> Hf | 2SE      | <sup>180</sup> Hf/ <sup>177</sup> Hf | 2SE      | Age (Ma) | <sup>176</sup> Hf/ <sup>177</sup> Hf( <i>i</i> ) | εHF(0) | εHf( <i>i</i> ) | 2SE |
|---------------|--------------------------------------|----------|--------------------------------------|----------|--------------------------------------|----------|--------------------------------------|----------|--------------------------------------|----------|----------|--------------------------------------------------|--------|-----------------|-----|
| BRNF15-59_09  | 0.282827                             | 0.000049 | 0.001858                             | 0.000006 | 0.045690                             | 0.000230 | 1.467131                             | 0.000058 | 1.887200                             | 0.000170 | 450.3    | 0.282811                                         | 1.5    | 11.0            | 1.7 |
| BRNF15-59_21  | 0.282652                             | 0.000074 | 0.002186                             | 0.000056 | 0.054700                             | 0.001500 | 1.467082                             | 0.000055 | 1.887220                             | 0.000210 | 304.5    | 0.282640                                         | -4.7   | 1.6             | 2.6 |
| BRNF15-59_39  | 0.282755                             | 0.000056 | 0.001494                             | 0.000029 | 0.039200                             | 0.001000 | 1.467136                             | 0.000074 | 1.886970                             | 0.000150 | 479.0    | 0.282742                                         | -1.1   | 9.1             | 2.0 |
| BRNF15-59_40  | 0.283079                             | 0.000053 | 0.001546                             | 0.000022 | 0.043370                             | 0.000300 | 1.467070                             | 0.000057 | 1.886980                             | 0.000170 | 195.4    | 0.283073                                         | 10.4   | 14.5            | 1.9 |
| BRNF15-59_41  | 0.282972                             | 0.000045 | 0.000840                             | 0.000170 | 0.026900                             | 0.006700 | 1.467125                             | 0.000044 | 1.886970                             | 0.000160 | 353.1    | 0.282967                                         | 6.6    | 14.3            | 1.6 |
| BRNF15-59_45  | 0.283119                             | 0.000059 | 0.000689                             | 0.000005 | 0.016840                             | 0.000120 | 1.467146                             | 0.000068 | 1.887000                             | 0.000220 | 208.8    | 0.283116                                         | 11.8   | 16.4            | 2.1 |
| BRNF15-59_48  | 0.282763                             | 0.000037 | 0.000965                             | 0.000013 | 0.026640                             | 0.000600 | 1.467114                             | 0.000045 | 1.887110                             | 0.000120 | 383.4    | 0.282756                                         | -0.8   | 7.5             | 1.3 |
| BRNF15-59_54  | 0.282735                             | 0.000047 | 0.001144                             | 0.000008 | 0.034860                             | 0.000150 | 1.467141                             | 0.000078 | 1.887040                             | 0.000220 | 399.2    | 0.282726                                         | -1.8   | 6.8             | 1.7 |
| BRNF15-59_56  | 0.282446                             | 0.000064 | 0.002569                             | 0.000038 | 0.067400                             | 0.002000 | 1.467028                             | 0.000072 | 1.887090                             | 0.000170 | 459.6    | 0.282424                                         | -12.0  | -2.5            | 2.3 |
| BRNF15-59_61  | 0.282797                             | 0.000052 | 0.001294                             | 0.000016 | 0.028080                             | 0.000480 | 1.467075                             | 0.000059 | 1.887100                             | 0.000140 | 454.4    | 0.282786                                         | 0.4    | 10.2            | 1.8 |
| BRNF15-59_65  | 0.282761                             | 0.000059 | 0.005435                             | 0.000096 | 0.152200                             | 0.002100 | 1.467068                             | 0.000057 | 1.886960                             | 0.000160 | 435.6    | 0.282717                                         | -0.8   | 7.3             | 2.1 |
| BRNF15-59_76  | 0.282766                             | 0.000037 | 0.001006                             | 0.000011 | 0.023260                             | 0.000220 | 1.467071                             | 0.000057 | 1.886910                             | 0.000140 | 449.6    | 0.282758                                         | -0.7   | 9.1             | 1.3 |
| BRNF15-59_78  | 0.282052                             | 0.000043 | 0.000756                             | 0.000012 | 0.022000                             | 0.000120 | 1.467044                             | 0.000052 | 1.886890                             | 0.000140 | 388.6    | 0.282046                                         | -25.9  | -17.5           | 1.5 |
| BRNF15-59_97  | 0.282652                             | 0.000040 | 0.001402                             | 0.000033 | 0.037900                             | 0.001200 | 1.467027                             | 0.000046 | 1.887020                             | 0.000110 | 334.1    | 0.282643                                         | -4.7   | 2.4             | 1.4 |
| BRNF15-59_100 | 0.282812                             | 0.000076 | 0.002191                             | 0.000012 | 0.046210                             | 0.000370 | 1.466920                             | 0.000120 | 1.887580                             | 0.000240 | 196.7    | 0.282804                                         | 1.0    | 5.0             | 2.7 |
| BRNF15-59_102 | 0.282541                             | 0.000047 | 0.001028                             | 0.000016 | 0.024900                             | 0.000650 | 1.467119                             | 0.000055 | 1.887080                             | 0.000170 | 494.9    | 0.282531                                         | -8.6   | 2.1             | 1.7 |

| Sample        | <sup>176</sup> Hf/ <sup>177</sup> Hf | 2SE      | <sup>176</sup> Lu/ <sup>177</sup> Hf | 2SE      | <sup>176</sup> Yb/ <sup>177</sup> Hf | 2SE      | <sup>178</sup> Hf/ <sup>177</sup> Hf | 2SE      | <sup>180</sup> Hf/ <sup>177</sup> Hf | 2SE      | Age (Ma) | <sup>176</sup> Hf/ <sup>177</sup> Hf( <i>i</i> ) | εHF(0) | εHf( <i>i</i> ) | 2SE |
|---------------|--------------------------------------|----------|--------------------------------------|----------|--------------------------------------|----------|--------------------------------------|----------|--------------------------------------|----------|----------|--------------------------------------------------|--------|-----------------|-----|
| BRNF15-60_05  | 0.283116                             | 0.000029 | 0.000889                             | 0.000033 | 0.019570                             | 0.000670 | 1.467127                             | 0.000030 | 1.886923                             | 0.000095 | 191.5    | 0.283113                                         | 11.7   | 15.9            | 1.0 |
| BRNF15-60_11  | 0.282748                             | 0.000040 | 0.000978                             | 0.000027 | 0.028700                             | 0.001100 | 1.467092                             | 0.000037 | 1.886830                             | 0.000110 | 113.1    | 0.282746                                         | -1.3   | 1.1             | 1.4 |
| BRNF15-60_12  | 0.283047                             | 0.000039 | 0.000577                             | 0.000029 | 0.015260                             | 0.000750 | 1.467142                             | 0.000034 | 1.886960                             | 0.000130 | 199.7    | 0.283045                                         | 9.3    | 13.6            | 1.4 |
| BRNF15-60_18  | 0.282761                             | 0.000030 | 0.000592                             | 0.000015 | 0.013930                             | 0.000410 | 1.467175                             | 0.000036 | 1.886960                             | 0.000110 | 438.1    | 0.282756                                         | -0.8   | 8.7             | 1.1 |
| BRNF15-60_21  | 0.282991                             | 0.000078 | 0.001108                             | 0.000011 | 0.027320                             | 0.000310 | 1.467018                             | 0.000070 | 1.887080                             | 0.000250 | 193.5    | 0.282987                                         | 7.3    | 11.5            | 2.8 |
| BRNF15-60_25  | 0.282526                             | 0.000039 | 0.001032                             | 0.000011 | 0.029200                             | 0.000430 | 1.467132                             | 0.000029 | 1.886940                             | 0.000110 | 190.9    | 0.282522                                         | -9.2   | -5.0            | 1.4 |
| BRNF15-60_27  | 0.282659                             | 0.000045 | 0.000514                             | 0.000017 | 0.013950                             | 0.000250 | 1.467122                             | 0.000049 | 1.887210                             | 0.000170 | 114.0    | 0.282658                                         | -4.5   | -2.0            | 1.6 |
| BRNF15-60_28  | 0.283098                             | 0.000022 | 0.000762                             | 0.000045 | 0.016930                             | 0.000990 | 1.467116                             | 0.000038 | 1.886952                             | 0.000078 | 202.7    | 0.283095                                         | 11.1   | 15.5            | 0.8 |
| BRNF15-60_44  | 0.281673                             | 0.000024 | 0.001017                             | 0.000040 | 0.027900                             | 0.001000 | 1.467112                             | 0.000045 | 1.887069                             | 0.000079 | 444.9    | 0.281664                                         | -39.3  | -29.7           | 0.9 |
| BRNF15-60_55  | 0.282561                             | 0.000040 | 0.001002                             | 0.000073 | 0.028900                             | 0.002700 | 1.467159                             | 0.000035 | 1.886980                             | 0.000110 | 305.4    | 0.282555                                         | -7.9   | -1.3            | 1.4 |
| BRNF15-60_67  | 0.282107                             | 0.000032 | 0.002012                             | 0.000063 | 0.063100                             | 0.003100 | 1.467119                             | 0.000035 | 1.886930                             | 0.000130 | 360.3    | 0.282093                                         | -24.0  | -16.5           | 1.1 |
| BRNF15-60_69  | 0.283098                             | 0.000062 | 0.000571                             | 0.000014 | 0.014130                             | 0.000180 | 1.467138                             | 0.000042 | 1.886970                             | 0.000220 | 205.6    | 0.283096                                         | 11.1   | 15.6            | 2.2 |
| BRNF15-60_72  | 0.283095                             | 0.000041 | 0.000546                             | 0.000025 | 0.014240                             | 0.000790 | 1.467141                             | 0.000040 | 1.886950                             | 0.000130 | 204.3    | 0.283093                                         | 11.0   | 15.4            | 1.4 |
| BRNF15-60_94  | 0.282832                             | 0.000043 | 0.001988                             | 0.000074 | 0.059900                             | 0.003100 | 1.467100                             | 0.000035 | 1.887020                             | 0.000130 | 357.2    | 0.282819                                         | 1.7    | 9.2             | 1.5 |
| BRNF15-60_95  | 0.282671                             | 0.000039 | 0.000658                             | 0.000021 | 0.015730                             | 0.000440 | 1.467145                             | 0.000037 | 1.886930                             | 0.000140 | 360.5    | 0.282667                                         | -4.0   | 3.8             | 1.4 |
| BRNF15-60_96  | 0.282147                             | 0.000040 | 0.000841                             | 0.000045 | 0.027400                             | 0.002200 | 1.467146                             | 0.000034 | 1.887000                             | 0.000130 | 331.5    | 0.282142                                         | -22.6  | -15.4           | 1.4 |
| BRNF15-60_97  | 0.282731                             | 0.000034 | 0.000804                             | 0.000048 | 0.019500                             | 0.001200 | 1.467104                             | 0.000032 | 1.886950                             | 0.000120 | 356.3    | 0.282726                                         | -1.9   | 5.8             | 1.2 |
| BRNF15-60_99  | 0.282774                             | 0.000038 | 0.000879                             | 0.000016 | 0.018800                             | 0.000350 | 1.467164                             | 0.000042 | 1.886850                             | 0.000140 | 400.7    | 0.282767                                         | -0.4   | 8.3             | 1.3 |
| BRNF15-60_102 | 0.282263                             | 0.000037 | 0.001607                             | 0.000036 | 0.041820                             | 0.000690 | 1.467100                             | 0.000039 | 1.887140                             | 0.000160 | 408.1    | 0.282251                                         | -18.5  | -9.8            | 1.3 |

| Sample       | <sup>176</sup> Hf/ <sup>177</sup> Hf | 2SE      | <sup>176</sup> Lu/ <sup>177</sup> Hf | 2SE      | <sup>176</sup> Yb/ <sup>177</sup> Hf | 2SE      | <sup>178</sup> Hf/ <sup>177</sup> Hf | 2SE      | <sup>180</sup> Hf/ <sup>177</sup> Hf | 2SE      | Age (Ma) | <sup>176</sup> Hf/ <sup>177</sup> Hf( <i>i</i> ) | εHF(0) | εHf( <i>i</i> ) | 2SE |
|--------------|--------------------------------------|----------|--------------------------------------|----------|--------------------------------------|----------|--------------------------------------|----------|--------------------------------------|----------|----------|--------------------------------------------------|--------|-----------------|-----|
| BRHR14-1A_13 | 0.282789                             | 0.000043 | 0.000672                             | 0.000031 | 0.017570                             | 0.000880 | 1.467169                             | 0.000063 | 1.886980                             | 0.000150 | 113.7    | 0.282788                                         | 0.1    | 2.6             | 1.5 |
| BRHR14-1A_34 | 0.282744                             | 0.000045 | 0.001103                             | 0.000024 | 0.028590                             | 0.000620 | 1.467221                             | 0.000082 | 1.887300                             | 0.000170 | 109.6    | 0.282742                                         | -1.4   | 0.9             | 1.6 |
| BRHR14-1A_44 | 0.282733                             | 0.000037 | 0.001003                             | 0.000005 | 0.026250                             | 0.000210 | 1.467187                             | 0.000046 | 1.887130                             | 0.000110 | 109.6    | 0.282731                                         | -1.8   | 0.5             | 1.3 |
| BRHR14-1A_49 | 0.282624                             | 0.000042 | 0.001253                             | 0.000021 | 0.031630                             | 0.000430 | 1.467142                             | 0.000062 | 1.886990                             | 0.000260 | 113.1    | 0.282621                                         | -5.7   | -3.3            | 1.5 |
| BRHR14-1A_50 | 0.282766                             | 0.000030 | 0.000794                             | 0.000025 | 0.021460                             | 0.000630 | 1.467184                             | 0.000041 | 1.886990                             | 0.000076 | 115.0    | 0.282764                                         | -0.7   | 1.8             | 1.1 |
| BRHR14-1A_86 | 0.282786                             | 0.000030 | 0.001998                             | 0.000071 | 0.053600                             | 0.001800 | 1.467159                             | 0.000043 | 1.887112                             | 0.000098 | 111.8    | 0.282782                                         | 0.0    | 2.4             | 1.1 |

|              |          |          |          |          |          |          |          |          |          |          |       |          |      |     |     |
|--------------|----------|----------|----------|----------|----------|----------|----------|----------|----------|----------|-------|----------|------|-----|-----|
| BRHR14-1A_87 | 0.282787 | 0.000038 | 0.000582 | 0.000014 | 0.014490 | 0.000310 | 1.467202 | 0.000056 | 1.887080 | 0.000100 | 116.1 | 0.282786 | 0.1  | 2.6 | 1.3 |
| BRHR14-1A_95 | 0.282759 | 0.000042 | 0.000697 | 0.000053 | 0.018600 | 0.001400 | 1.467190 | 0.000043 | 1.887120 | 0.000140 | 107.2 | 0.282758 | -0.9 | 1.4 | 1.5 |

| Sample      | <sup>176</sup> Hf/ <sup>177</sup> Hf | 2SE      | <sup>176</sup> Lu/ <sup>177</sup> Hf | 2SE      | <sup>176</sup> Yb/ <sup>177</sup> Hf | 2SE      | <sup>178</sup> Hf/ <sup>177</sup> Hf | 2SE      | <sup>180</sup> Hf/ <sup>177</sup> Hf | 2SE      | Age (Ma) | <sup>176</sup> Hf/ <sup>177</sup> Hf(i) | εHF(0) | εHf(i) | 2SE |
|-------------|--------------------------------------|----------|--------------------------------------|----------|--------------------------------------|----------|--------------------------------------|----------|--------------------------------------|----------|----------|-----------------------------------------|--------|--------|-----|
| BRK14-10_03 | 0.282574                             | 0.000035 | 0.001608                             | 0.000016 | 0.038260                             | 0.000370 | 1.467217                             | 0.000057 | 1.886920                             | 0.000210 | 443.3    | 0.282561                                | -7.5   | 1.9    | 1.2 |
| BRK14-10_07 | 0.282765                             | 0.000044 | 0.001978                             | 0.000072 | 0.045800                             | 0.001600 | 1.467140                             | 0.000033 | 1.887030                             | 0.000140 | 408.3    | 0.282750                                | -0.7   | 7.9    | 1.6 |
| BRK14-10_43 | 0.282785                             | 0.000030 | 0.000923                             | 0.000047 | 0.021900                             | 0.001100 | 1.467124                             | 0.000032 | 1.887010                             | 0.000100 | 421.0    | 0.282778                                | 0.0    | 9.1    | 1.1 |
| BRK14-10_50 | 0.282494                             | 0.000043 | 0.001446                             | 0.000065 | 0.035500                             | 0.001600 | 1.467138                             | 0.000033 | 1.887080                             | 0.000130 | 496.9    | 0.282481                                | -10.3  | 0.3    | 1.5 |
| BRK14-10_53 | 0.282823                             | 0.000033 | 0.000996                             | 0.000013 | 0.019580                             | 0.000270 | 1.467178                             | 0.000035 | 1.886990                             | 0.000120 | 428.7    | 0.282815                                | 1.3    | 10.6   | 1.2 |
| BRK14-10_59 | 0.282739                             | 0.000038 | 0.000631                             | 0.000030 | 0.015630                             | 0.000750 | 1.467189                             | 0.000040 | 1.887010                             | 0.000130 | 406.1    | 0.282734                                | -1.6   | 7.3    | 1.3 |
| BRK14-10_86 | 0.282866                             | 0.000036 | 0.001317                             | 0.000018 | 0.029910                             | 0.000490 | 1.467203                             | 0.000040 | 1.886980                             | 0.000110 | 468.5    | 0.282855                                | 2.9    | 12.9   | 1.3 |

| Sample      | <sup>176</sup> Hf/ <sup>177</sup> Hf | 2SE      | <sup>176</sup> Lu/ <sup>177</sup> Hf | 2SE      | <sup>176</sup> Yb/ <sup>177</sup> Hf | 2SE      | <sup>178</sup> Hf/ <sup>177</sup> Hf | 2SE      | <sup>180</sup> Hf/ <sup>177</sup> Hf | 2SE      | Age (Ma) | <sup>176</sup> Hf/ <sup>177</sup> Hf(i) | εHF(0) | εHf(i) | 2SE  |
|-------------|--------------------------------------|----------|--------------------------------------|----------|--------------------------------------|----------|--------------------------------------|----------|--------------------------------------|----------|----------|-----------------------------------------|--------|--------|------|
| BRK14-7a_61 | 0.283033                             | 0.000023 | 0.001380                             | 0.000043 | 0.035700                             | 0.000970 | 1.467176                             | 0.000031 | 1.887000                             | 0.000075 | 164.2    | 0.283029                                | 8.8    | 12.3   | 0.8  |
| BRK14-7a_74 | 0.282613                             | 0.000061 | 0.001950                             | 0.000110 | 0.050100                             | 0.003500 | 1.467074                             | 0.000047 | 1.887320                             | 0.000210 | 114.2    | 0.282609                                | -6.1   | -3.7   | 2.2  |
| BRK14-7a_80 | 0.282800                             | 0.000032 | 0.001504                             | 0.000031 | 0.036760                             | 0.000680 | 1.467176                             | 0.000027 | 1.886990                             | 0.000120 | 110.6    | 0.282797                                | 0.5    | 2.9    | 1.1  |
| BRK14-7a_90 | 0.282796                             | 0.000040 | 0.001147                             | 0.000023 | 0.027820                             | 0.000440 | 1.467186                             | 0.000031 | 1.887020                             | 0.000130 | 113.0    | 0.282794                                | 0.4    | 2.8    | 1.4  |
| BRK14-7a_97 | 0.282896                             | 0.000032 | 0.003450                             | 0.000047 | 0.083000                             | 0.001600 | 1.467103                             | 0.000037 | 1.886939                             | 0.000061 | 364.7    | 0.282774                                | 3.9    | 1.1    | 41.8 |

| Sample     | <sup>176</sup> Hf/ <sup>177</sup> Hf | 2SE      | <sup>176</sup> Lu/ <sup>177</sup> Hf | 2SE      | <sup>176</sup> Yb/ <sup>177</sup> Hf | 2SE      | <sup>178</sup> Hf/ <sup>177</sup> Hf | 2SE      | <sup>180</sup> Hf/ <sup>177</sup> Hf | 2SE      | Age (Ma) | <sup>176</sup> Hf/ <sup>177</sup> Hf(i) | εHF(0) | εHf(i) | 2SE |
|------------|--------------------------------------|----------|--------------------------------------|----------|--------------------------------------|----------|--------------------------------------|----------|--------------------------------------|----------|----------|-----------------------------------------|--------|--------|-----|
| BRK14-9_01 | 0.282795                             | 0.000036 | 0.001333                             | 0.000033 | 0.034100                             | 0.001200 | 1.467161                             | 0.000049 | 1.886930                             | 0.000130 | 350.7    | 0.282786                                | 0.4    | 7.9    | 1.3 |
| BRK14-9_04 | 0.282492                             | 0.000047 | 0.001174                             | 0.000007 | 0.028490                             | 0.000140 | 1.467112                             | 0.000054 | 1.887190                             | 0.000120 | 403.9    | 0.282483                                | -10.4  | -1.7   | 1.7 |
| BRK14-9_07 | 0.282070                             | 0.000028 | 0.000675                             | 0.000015 | 0.016620                             | 0.000450 | 1.467157                             | 0.000045 | 1.886970                             | 0.000076 | 376.1    | 0.282065                                | -25.3  | -17.1  | 1.0 |
| BRK14-9_09 | 0.282352                             | 0.000026 | 0.001327                             | 0.000085 | 0.033600                             | 0.002500 | 1.467193                             | 0.000030 | 1.887010                             | 0.000110 | 372.2    | 0.282343                                | -15.3  | -7.4   | 0.9 |
| BRK14-9_14 | 0.281597                             | 0.000027 | 0.000634                             | 0.000004 | 0.015940                             | 0.000170 | 1.467147                             | 0.000048 | 1.887170                             | 0.000120 | 428.3    | 0.281592                                | -42.0  | -32.7  | 1.0 |
| BRK14-9_37 | 0.282206                             | 0.000032 | 0.001131                             | 0.000056 | 0.031300                             | 0.001500 | 1.467189                             | 0.000045 | 1.887050                             | 0.000110 | 362.4    | 0.282198                                | -20.5  | -12.7  | 1.1 |
| BRK14-9_40 | 0.281103                             | 0.000039 | 0.000416                             | 0.000006 | 0.010330                             | 0.000140 | 1.467174                             | 0.000041 | 1.887120                             | 0.000100 | 431.4    | 0.281099                                | -59.5  | -50.1  | 1.4 |
| BRK14-9_41 | 0.282070                             | 0.000052 | 0.002210                             | 0.000110 | 0.060900                             | 0.003000 | 1.467153                             | 0.000071 | 1.887150                             | 0.000130 | 351.0    | 0.282055                                | -25.3  | -18.0  | 1.8 |
| BRK14-9_43 | 0.280917                             | 0.000030 | 0.000892                             | 0.000030 | 0.021220                             | 0.000650 | 1.467133                             | 0.000040 | 1.887140                             | 0.000130 | 362.4    | 0.280911                                | -66.1  | -58.3  | 1.1 |
| BRK14-9_47 | 0.282127                             | 0.000039 | 0.001207                             | 0.000022 | 0.029700                             | 0.000440 | 1.467170                             | 0.000041 | 1.887010                             | 0.000120 | 351.0    | 0.282119                                | -23.3  | -15.8  | 1.4 |
| BRK14-9_51 | 0.282283                             | 0.000039 | 0.001388                             | 0.000020 | 0.036690                             | 0.000420 | 1.467188                             | 0.000043 | 1.887090                             | 0.000110 | 347.8    | 0.282274                                | -17.8  | -10.3  | 1.4 |
| BRK14-9_58 | 0.282214                             | 0.000030 | 0.000920                             | 0.000019 | 0.023630                             | 0.000610 | 1.467123                             | 0.000029 | 1.887058                             | 0.000084 | 347.8    | 0.282208                                | -20.2  | -12.7  | 1.1 |
| BRK14-9_70 | 0.282353                             | 0.000031 | 0.001348                             | 0.000051 | 0.038300                             | 0.001600 | 1.467196                             | 0.000040 | 1.887000                             | 0.000120 | 363.3    | 0.282344                                | -15.3  | -7.5   | 1.1 |
| BRK14-9_75 | 0.281044                             | 0.000045 | 0.000425                             | 0.000012 | 0.011200                             | 0.000360 | 1.467138                             | 0.000043 | 1.887260                             | 0.000130 | 436.2    | 0.281040                                | -61.6  | -52.0  | 1.6 |
| BRK14-9_80 | 0.282759                             | 0.000032 | 0.001713                             | 0.000019 | 0.047140                             | 0.000700 | 1.467145                             | 0.000045 | 1.886990                             | 0.000110 | 390.2    | 0.282747                                | -0.9   | 7.3    | 1.1 |
| BRK14-9_85 | 0.282587                             | 0.000033 | 0.003100                             | 0.000210 | 0.083300                             | 0.006300 | 1.467124                             | 0.000037 | 1.887120                             | 0.000100 | 393.9    | 0.282564                                | -7.0   | 1.0    | 1.2 |
| BRK14-9_89 | 0.282729                             | 0.000031 | 0.001186                             | 0.000028 | 0.026710                             | 0.000550 | 1.467141                             | 0.000035 | 1.887080                             | 0.000100 | 392.5    | 0.282720                                | -2.0   | 6.5    | 1.1 |
| BRK14-9_93 | 0.282548                             | 0.000053 | 0.002249                             | 0.000032 | 0.067470                             | 0.000820 | 1.467087                             | 0.000075 | 1.887420                             | 0.000250 | 369.4    | 0.282532                                | -8.4   | -0.7   | 1.9 |

| Sample     | <sup>176</sup> Hf/ <sup>177</sup> Hf | 2SE      | <sup>176</sup> Lu/ <sup>177</sup> Hf | 2SE      | <sup>176</sup> Yb/ <sup>177</sup> Hf | 2SE      | <sup>178</sup> Hf/ <sup>177</sup> Hf | 2SE      | <sup>180</sup> Hf/ <sup>177</sup> Hf | 2SE      | Age (Ma) | <sup>176</sup> Hf/ <sup>177</sup> Hf(i) | εHF(0) | εHf(i) | 2SE |
|------------|--------------------------------------|----------|--------------------------------------|----------|--------------------------------------|----------|--------------------------------------|----------|--------------------------------------|----------|----------|-----------------------------------------|--------|--------|-----|
| BRK14-4_6  | 0.282754                             | 0.000031 | 0.002198                             | 0.000039 | 0.059830                             | 0.000960 | 1.467068                             | 0.000047 | 1.886899                             | 0.000099 | 354.0    | 0.282739                                | -1.1   | 1.1    | 6.3 |
| BRK14-4_8  | 0.282686                             | 0.000037 | 0.000500                             | 0.000007 | 0.010670                             | 0.000180 | 1.467084                             | 0.000057 | 1.886948                             | 0.000097 | 396.2    | 0.282682                                | -3.5   | 1.3    | 5.2 |
| BRK14-4_11 | 0.282833                             | 0.000027 | 0.001565                             | 0.000027 | 0.045990                             | 0.000580 | 1.467106                             | 0.000040 | 1.886809                             | 0.000072 | 352.3    | 0.282823                                | 1.7    | 1.0    | 9.2 |

|             |          |          |          |          |          |          |          |          |          |          |       |          |       |     |       |
|-------------|----------|----------|----------|----------|----------|----------|----------|----------|----------|----------|-------|----------|-------|-----|-------|
| BRK14-4_14  | 0.282760 | 0.000047 | 0.002318 | 0.000098 | 0.056000 | 0.002300 | 1.466983 | 0.000066 | 1.886930 | 0.000120 | 380.8 | 0.282744 | -0.9  | 1.7 | 7.0   |
| BRK14-4_15  | 0.282687 | 0.000039 | 0.001280 | 0.000120 | 0.032900 | 0.003000 | 1.467000 | 0.000052 | 1.886980 | 0.000120 | 407.8 | 0.282677 | -3.5  | 1.4 | 5.3   |
| BRK14-4_19  | 0.282026 | 0.000054 | 0.001280 | 0.000130 | 0.032200 | 0.003500 | 1.467072 | 0.000078 | 1.886990 | 0.000140 | 537.4 | 0.282013 | -26.8 | 1.9 | -15.3 |
| BRK14-4_20  | 0.282056 | 0.000031 | 0.000904 | 0.000008 | 0.022380 | 0.000220 | 1.467088 | 0.000045 | 1.886932 | 0.000071 | 369.5 | 0.282050 | -25.8 | 1.1 | -17.8 |
| BRK14-4_27  | 0.281763 | 0.000024 | 0.001477 | 0.000024 | 0.037650 | 0.000540 | 1.467118 | 0.000044 | 1.886811 | 0.000074 | 427.4 | 0.281751 | -36.1 | 0.9 | -27.1 |
| BRK14-4_35  | 0.281939 | 0.000038 | 0.000622 | 0.000029 | 0.016380 | 0.000590 | 1.467093 | 0.000049 | 1.886950 | 0.000100 | 368.1 | 0.281935 | -29.9 | 1.3 | -21.9 |
| BRK14-4_36  | 0.281119 | 0.000024 | 0.001100 | 0.000041 | 0.027900 | 0.001100 | 1.467068 | 0.000035 | 1.886883 | 0.000061 | 357.4 | 0.281111 | -58.9 | 0.9 | -51.3 |
| BRK14-4_50  | 0.282787 | 0.000041 | 0.000606 | 0.000019 | 0.015750 | 0.000280 | 1.467060 | 0.000082 | 1.886855 | 0.000082 | 431.3 | 0.282782 | 0.1   | 1.5 | 9.5   |
| BRK14-4_68  | 0.282752 | 0.000021 | 0.000608 | 0.000010 | 0.015360 | 0.000350 | 1.467139 | 0.000043 | 1.886828 | 0.000068 | 395.2 | 0.282748 | -1.2  | 0.7 | 7.5   |
| BRK14-4_76  | 0.282756 | 0.000035 | 0.001146 | 0.000008 | 0.031060 | 0.000560 | 1.467121 | 0.000063 | 1.886852 | 0.000089 | 401.1 | 0.282747 | -1.0  | 1.2 | 7.6   |
| BRK14-4_81  | 0.282710 | 0.000039 | 0.001775 | 0.000043 | 0.047900 | 0.001100 | 1.467049 | 0.000088 | 1.886960 | 0.000110 | 372.0 | 0.282698 | -2.7  | 1.4 | 5.2   |
| BRK14-4_90  | 0.282784 | 0.000020 | 0.000850 | 0.000029 | 0.022250 | 0.000810 | 1.467122 | 0.000045 | 1.886795 | 0.000060 | 409.9 | 0.282778 | 0.0   | 0.7 | 8.9   |
| BRK14-4_94  | 0.282729 | 0.000030 | 0.000646 | 0.000008 | 0.015960 | 0.000220 | 1.467119 | 0.000053 | 1.886874 | 0.000075 | 421.7 | 0.282724 | -2.0  | 1.1 | 7.2   |
| BRK14-4_99  | 0.282434 | 0.000024 | 0.000457 | 0.000006 | 0.011579 | 0.000099 | 1.467125 | 0.000050 | 1.886835 | 0.000077 | 517.2 | 0.282430 | -12.4 | 0.8 | -1.0  |
| BRK14-4_100 | 0.282784 | 0.000026 | 0.002536 | 0.000049 | 0.065800 | 0.001000 | 1.467115 | 0.000042 | 1.886915 | 0.000072 | 415.5 | 0.282764 | 0.0   | 0.9 | 8.5   |

| Sample     | <sup>176</sup> Hf/ <sup>177</sup> Hf | 2SE      | <sup>176</sup> Lu/ <sup>177</sup> Hf | 2SE      | <sup>176</sup> Yb/ <sup>177</sup> Hf | 2SE      | <sup>178</sup> Hf/ <sup>177</sup> Hf | 2SE      | <sup>180</sup> Hf/ <sup>177</sup> Hf | 2SE      | Age (Ma) | <sup>176</sup> Hf/ <sup>177</sup> Hf( <i>i</i> ) | εHF(0) | εHf( <i>i</i> ) | 2SE  |
|------------|--------------------------------------|----------|--------------------------------------|----------|--------------------------------------|----------|--------------------------------------|----------|--------------------------------------|----------|----------|--------------------------------------------------|--------|-----------------|------|
| BRK14-5_44 | 0.282378                             | 0.000026 | 0.000679                             | 0.000028 | 0.020140                             | 0.000640 | 1.467101                             | 0.000047 | 1.886819                             | 0.000077 | 532.8    | 0.282371                                         | -14.4  | 0.9             | -2.8 |
| BRK14-5_70 | 0.282463                             | 0.000030 | 0.001415                             | 0.000034 | 0.041130                             | 0.000780 | 1.467140                             | 0.000056 | 1.886845                             | 0.000082 | 535.3    | 0.282449                                         | -11.4  | 1.1             | 0.0  |

| Sample     | <sup>176</sup> Hf/ <sup>177</sup> Hf | 2SE      | <sup>176</sup> Lu/ <sup>177</sup> Hf | 2SE      | <sup>176</sup> Yb/ <sup>177</sup> Hf | 2SE      | <sup>178</sup> Hf/ <sup>177</sup> Hf | 2SE      | <sup>180</sup> Hf/ <sup>177</sup> Hf | 2SE      | Age (Ma) | <sup>176</sup> Hf/ <sup>177</sup> Hf( <i>i</i> ) | εHF(0) | εHf( <i>i</i> ) | 2SE  |
|------------|--------------------------------------|----------|--------------------------------------|----------|--------------------------------------|----------|--------------------------------------|----------|--------------------------------------|----------|----------|--------------------------------------------------|--------|-----------------|------|
| BRK14-6_13 | 0.282848                             | 0.000036 | 0.003350                             | 0.000085 | 0.090300                             | 0.003200 | 1.467124                             | 0.000045 | 1.886981                             | 0.000093 | 468.7    | 0.282819                                         | 2.2    | 1.3             | 11.6 |
| BRK14-6_50 | 0.282670                             | 0.000037 | 0.001477                             | 0.000051 | 0.037400                             | 0.001200 | 1.467045                             | 0.000052 | 1.886900                             | 0.000110 | 473.8    | 0.282657                                         | -4.1   | 1.3             | 6.0  |

### Type 3

| Sample        | <sup>176</sup> Hf/ <sup>177</sup> Hf | 2SE      | <sup>176</sup> Lu/ <sup>177</sup> Hf | 2SE      | <sup>176</sup> Yb/ <sup>177</sup> Hf | 2SE      | <sup>178</sup> Hf/ <sup>177</sup> Hf | 2SE      | <sup>180</sup> Hf/ <sup>177</sup> Hf | 2SE      | Age (Ma) | <sup>176</sup> Hf/ <sup>177</sup> Hf( <i>i</i> ) | εHF(0) | εHf( <i>i</i> ) | 2SE   |
|---------------|--------------------------------------|----------|--------------------------------------|----------|--------------------------------------|----------|--------------------------------------|----------|--------------------------------------|----------|----------|--------------------------------------------------|--------|-----------------|-------|
| BRJR13-K1c_2  | 0.282701                             | 0.000039 | 0.001078                             | 0.000064 | 0.027500                             | 0.001900 | 1.467016                             | 0.000056 | 1.886880                             | 0.000120 | 419.1    | 0.282693                                         | -3.0   | 1.4             | 6.1   |
| BRJR13-K1c_13 | 0.282516                             | 0.000045 | 0.000972                             | 0.000010 | 0.024130                             | 0.000360 | 1.467071                             | 0.000052 | 1.886900                             | 0.000110 | 385.4    | 0.282509                                         | -9.5   | 1.6             | -1.2  |
| BRJR13-K1c_32 | 0.282713                             | 0.000024 | 0.000525                             | 0.000007 | 0.013010                             | 0.000200 | 1.467100                             | 0.000040 | 1.886836                             | 0.000086 | 442.0    | 0.282709                                         | -2.5   | 0.8             | 7.2   |
| BRJR13-K1c_33 | 0.282729                             | 0.000028 | 0.002027                             | 0.000021 | 0.052870                             | 0.000530 | 1.467088                             | 0.000039 | 1.886908                             | 0.000095 | 410.4    | 0.282713                                         | -2.0   | 1.0             | 6.6   |
| BRJR13-K1c_34 | 0.282566                             | 0.000039 | 0.003520                             | 0.000043 | 0.106100                             | 0.001200 | 1.467055                             | 0.000058 | 1.886850                             | 0.000120 | 380.8    | 0.282541                                         | -7.7   | 1.4             | -0.2  |
| BRJR13-K1c_38 | 0.282450                             | 0.000032 | 0.001290                             | 0.000100 | 0.034300                             | 0.002800 | 1.467094                             | 0.000041 | 1.886938                             | 0.000074 | 442.6    | 0.282439                                         | -11.8  | 1.1             | -2.4  |
| BRJR13-K1c_41 | 0.282049                             | 0.000024 | 0.000577                             | 0.000004 | 0.015350                             | 0.000051 | 1.467116                             | 0.000035 | 1.886930                             | 0.000073 | 368.1    | 0.282045                                         | -26.0  | 0.9             | -18.0 |
| BRJR13-K1c_45 | 0.282029                             | 0.000035 | 0.000935                             | 0.000041 | 0.023700                             | 0.001000 | 1.467067                             | 0.000054 | 1.886946                             | 0.000099 | 369.3    | 0.282022                                         | -26.7  | 1.2             | -18.8 |
| BRJR13-K1c_47 | 0.282526                             | 0.000033 | 0.000875                             | 0.000016 | 0.022510                             | 0.000430 | 1.467103                             | 0.000048 | 1.886875                             | 0.000098 | 470.3    | 0.282518                                         | -9.2   | 1.2             | 1.0   |
| BRJR13-K1c_55 | 0.282775                             | 0.000039 | 0.001553                             | 0.000014 | 0.043730                             | 0.000680 | 1.467157                             | 0.000047 | 1.886920                             | 0.000110 | 373.9    | 0.282764                                         | -0.4   | 1.4             | 7.6   |
| BRJR13-K1c_58 | 0.282653                             | 0.000026 | 0.000892                             | 0.000004 | 0.024340                             | 0.000130 | 1.467121                             | 0.000036 | 1.886822                             | 0.000076 | 443.7    | 0.282646                                         | -4.7   | 0.9             | 5.0   |
| BRJR13-K1c_71 | 0.282744                             | 0.000024 | 0.000740                             | 0.000030 | 0.022450                             | 0.000920 | 1.467082                             | 0.000056 | 1.886838                             | 0.000097 | 505.4    | 0.282737                                         | -1.4   | 0.8             | 9.6   |
| BRJR13-K1c_72 | 0.282632                             | 0.000034 | 0.001030                             | 0.000064 | 0.032000                             | 0.001500 | 1.467123                             | 0.000048 | 1.886847                             | 0.000083 | 490.5    | 0.282623                                         | -5.4   | 1.2             | 5.2   |
| BRJR13-K1c_73 | 0.282783                             | 0.000055 | 0.002136                             | 0.000067 | 0.057800                             | 0.003100 | 1.467094                             | 0.000065 | 1.886900                             | 0.000100 | 459.3    | 0.282765                                         | -0.1   | 1.9             | 9.5   |
| BRJR13-K1c_76 | 0.282652                             | 0.000038 | 0.000465                             | 0.000010 | 0.013790                             | 0.000450 | 1.467178                             | 0.000065 | 1.886880                             | 0.000110 | 470.0    | 0.282648                                         | -4.7   | 1.3             | 5.6   |

| Sample | <sup>176</sup> Hf/ <sup>177</sup> Hf | 2SE | <sup>176</sup> Lu/ <sup>177</sup> Hf | 2SE | <sup>176</sup> Yb/ <sup>177</sup> Hf | 2SE | <sup>178</sup> Hf/ <sup>177</sup> Hf | 2SE | <sup>180</sup> Hf/ <sup>177</sup> Hf | 2SE | Age (Ma) | <sup>176</sup> Hf/ <sup>177</sup> Hf( <i>i</i> ) | εHF(0) | εHf( <i>i</i> ) | 2SE |
|--------|--------------------------------------|-----|--------------------------------------|-----|--------------------------------------|-----|--------------------------------------|-----|--------------------------------------|-----|----------|--------------------------------------------------|--------|-----------------|-----|
|--------|--------------------------------------|-----|--------------------------------------|-----|--------------------------------------|-----|--------------------------------------|-----|--------------------------------------|-----|----------|--------------------------------------------------|--------|-----------------|-----|

|              |          |          |          |          |          |          |          |          |          |          |       |          |       |     |      |
|--------------|----------|----------|----------|----------|----------|----------|----------|----------|----------|----------|-------|----------|-------|-----|------|
| BRJR13-K2_5  | 0.282493 | 0.000028 | 0.001399 | 0.000045 | 0.041090 | 0.000970 | 1.467078 | 0.000045 | 1.886832 | 0.000082 | 424.6 | 0.282482 | -10.3 | 1.0 | -1.3 |
| BRJR13-K2_8  | 0.282267 | 0.000083 | 0.000998 | 0.000021 | 0.025320 | 0.000570 | 1.467000 | 0.000120 | 1.886870 | 0.000160 | 488.0 | 0.282258 | -18.3 | 2.9 | -7.8 |
| BRJR13-K2_11 | 0.282727 | 0.000028 | 0.001369 | 0.000023 | 0.033030 | 0.000580 | 1.467123 | 0.000054 | 1.886854 | 0.000071 | 376.1 | 0.282717 | -2.0  | 1.0 | 6.0  |
| BRJR13-K2_21 | 0.282734 | 0.000019 | 0.000851 | 0.000039 | 0.020040 | 0.000970 | 1.467134 | 0.000032 | 1.886851 | 0.000051 | 374.6 | 0.282728 | -1.8  | 0.7 | 6.3  |
| BRJR13-K2_35 | 0.282526 | 0.000026 | 0.000137 | 0.000002 | 0.003173 | 0.000040 | 1.467095 | 0.000047 | 1.886853 | 0.000069 | 408.3 | 0.282525 | -9.2  | 0.9 | -0.1 |
| BRJR13-K2_57 | 0.282397 | 0.000036 | 0.000903 | 0.000029 | 0.025090 | 0.000840 | 1.467105 | 0.000060 | 1.886947 | 0.000078 | 460.3 | 0.282389 | -13.7 | 1.3 | -3.7 |
| BRJR13-K2_4  | 0.282387 | 0.000022 | 0.001477 | 0.000037 | 0.043500 | 0.001300 | 1.467104 | 0.000030 | 1.886816 | 0.000070 | 488.4 | 0.282373 | -14.1 | 0.8 | -3.7 |
| BRJR13-K2_66 | 0.282670 | 0.000024 | 0.001545 | 0.000026 | 0.039800 | 0.000530 | 1.467099 | 0.000043 | 1.886891 | 0.000068 | 440.7 | 0.282657 | -4.1  | 0.8 | 5.3  |

Gabbro Clasts

Type 1

| Sample          | <sup>176</sup> Hf/ <sup>177</sup> Hf | 2SE      | <sup>176</sup> Lu/ <sup>177</sup> Hf | 2SE      | <sup>176</sup> Yb/ <sup>177</sup> Hf | 2SE      | <sup>178</sup> Hf/ <sup>177</sup> Hf | 2SE      | <sup>180</sup> Hf/ <sup>177</sup> Hf | 2SE      | Age (Ma) | <sup>176</sup> Hf/ <sup>177</sup> Hf(i) | εHF(0) | εHf(i) | 2SE |
|-----------------|--------------------------------------|----------|--------------------------------------|----------|--------------------------------------|----------|--------------------------------------|----------|--------------------------------------|----------|----------|-----------------------------------------|--------|--------|-----|
| BRJR13-K8B_06   | 0.283081                             | 0.000029 | 0.000849                             | 0.000040 | 0.022100                             | 0.001100 | 1.467092                             | 0.000027 | 1.887005                             | 0.000098 | 194.3    | 0.283078                                | 10.5   | 14.7   | 1.0 |
| BRJR13-K8B_08   | 0.283126                             | 0.000037 | 0.001901                             | 0.000025 | 0.047000                             | 0.001000 | 1.467152                             | 0.000024 | 1.886900                             | 0.000130 | 194.3    | 0.283119                                | 12.1   | 16.1   | 1.3 |
| BRJR13-K8B_10   | 0.283120                             | 0.000047 | 0.001474                             | 0.000016 | 0.035420                             | 0.000490 | 1.467186                             | 0.000041 | 1.886850                             | 0.000190 | 194.3    | 0.283115                                | 11.9   | 16.0   | 1.7 |
| BRJR13-K8B_11   | 0.283105                             | 0.000037 | 0.001103                             | 0.000023 | 0.028560                             | 0.000320 | 1.467128                             | 0.000033 | 1.887010                             | 0.000140 | 194.3    | 0.283101                                | 11.3   | 15.5   | 1.3 |
| BRJR13-K8B_12   | 0.283055                             | 0.000040 | 0.001610                             | 0.000140 | 0.040500                             | 0.003200 | 1.467118                             | 0.000042 | 1.887220                             | 0.000170 | 194.3    | 0.283049                                | 9.6    | 13.7   | 1.4 |
| BRJR13-K8B_17   | 0.283063                             | 0.000045 | 0.001770                             | 0.000074 | 0.044200                             | 0.001400 | 1.467110                             | 0.000040 | 1.887080                             | 0.000130 | 194.3    | 0.283057                                | 9.8    | 13.9   | 1.6 |
| Weighted Mean = |                                      |          |                                      |          |                                      |          |                                      |          |                                      |          |          |                                         |        | 14.9   | 1.0 |

Type 2

| Sample          | <sup>176</sup> Hf/ <sup>177</sup> Hf | 2SE      | <sup>176</sup> Lu/ <sup>177</sup> Hf | 2SE      | <sup>176</sup> Yb/ <sup>177</sup> Hf | 2SE      | <sup>178</sup> Hf/ <sup>177</sup> Hf | 2SE      | <sup>180</sup> Hf/ <sup>177</sup> Hf | 2SE      | Age (Ma) | <sup>176</sup> Hf/ <sup>177</sup> Hf(i) | εHF(0) | εHf(i) | 2SE |
|-----------------|--------------------------------------|----------|--------------------------------------|----------|--------------------------------------|----------|--------------------------------------|----------|--------------------------------------|----------|----------|-----------------------------------------|--------|--------|-----|
| BRNF15-58B_1_02 | 0.283086                             | 0.000024 | 0.000750                             | 0.000150 | 0.018500                             | 0.004100 | 1.467149                             | 0.000031 | 1.886824                             | 0.000085 | 180.5    | 0.283084                                | 10.6   | 14.6   | 0.8 |
| BRNF15-58B_1_03 | 0.283044                             | 0.000022 | 0.000977                             | 0.000030 | 0.026400                             | 0.000700 | 1.467125                             | 0.000027 | 1.887047                             | 0.000089 | 180.5    | 0.283041                                | 9.2    | 13.1   | 0.8 |
| BRNF15-58B_1_06 | 0.283104                             | 0.000021 | 0.000520                             | 0.000045 | 0.013800                             | 0.001300 | 1.467132                             | 0.000034 | 1.886907                             | 0.000076 | 180.5    | 0.283102                                | 11.3   | 15.2   | 0.7 |
| BRNF15-58B_1_07 | 0.283094                             | 0.000022 | 0.000541                             | 0.000010 | 0.014370                             | 0.000340 | 1.467115                             | 0.000026 | 1.886953                             | 0.000070 | 180.5    | 0.283092                                | 10.9   | 14.9   | 0.8 |
| BRNF15-58B_1_08 | 0.283071                             | 0.000028 | 0.000644                             | 0.000034 | 0.017100                             | 0.001000 | 1.467126                             | 0.000030 | 1.886939                             | 0.000080 | 180.5    | 0.283069                                | 10.1   | 14.1   | 1.0 |
| BRNF15-58B_1_09 | 0.283070                             | 0.000024 | 0.000649                             | 0.000028 | 0.017690                             | 0.000870 | 1.467123                             | 0.000028 | 1.886990                             | 0.000100 | 180.5    | 0.283068                                | 10.1   | 14.0   | 0.8 |
| BRNF15-58B_1_10 | 0.283094                             | 0.000025 | 0.000730                             | 0.000014 | 0.019970                             | 0.000470 | 1.467147                             | 0.000023 | 1.886985                             | 0.000081 | 180.5    | 0.283092                                | 10.9   | 14.9   | 0.9 |
| BRNF15-58B_1_12 | 0.283060                             | 0.000022 | 0.001060                             | 0.000110 | 0.028900                             | 0.002900 | 1.467139                             | 0.000032 | 1.887020                             | 0.000100 | 180.5    | 0.283057                                | 9.7    | 13.6   | 0.8 |
| BRNF15-58B_1_14 | 0.283063                             | 0.000024 | 0.000759                             | 0.000022 | 0.020390                             | 0.000560 | 1.467147                             | 0.000031 | 1.887060                             | 0.000100 | 180.5    | 0.283061                                | 9.8    | 13.8   | 0.8 |
| BRNF15-58B_1_15 | 0.283081                             | 0.000023 | 0.000519                             | 0.000022 | 0.013860                             | 0.000510 | 1.467149                             | 0.000032 | 1.887005                             | 0.000088 | 180.5    | 0.283079                                | 10.5   | 14.4   | 0.8 |
| BRNF15-58B_1_18 | 0.283074                             | 0.000021 | 0.000514                             | 0.000005 | 0.013330                             | 0.000240 | 1.467172                             | 0.000027 | 1.887058                             | 0.000074 | 180.5    | 0.283072                                | 10.2   | 14.2   | 0.7 |
| Weighted Mean = |                                      |          |                                      |          |                                      |          |                                      |          |                                      |          |          |                                         |        | 14.3   | 0.5 |

| Sample          | <sup>176</sup> Hf/ <sup>177</sup> Hf | 2SE      | <sup>176</sup> Lu/ <sup>177</sup> Hf | 2SE      | <sup>176</sup> Yb/ <sup>177</sup> Hf | 2SE      | <sup>178</sup> Hf/ <sup>177</sup> Hf | 2SE      | <sup>180</sup> Hf/ <sup>177</sup> Hf | 2SE      | Age (Ma) | <sup>176</sup> Hf/ <sup>177</sup> Hf(i) | εHF(0) | εHf(i) | 2SE |
|-----------------|--------------------------------------|----------|--------------------------------------|----------|--------------------------------------|----------|--------------------------------------|----------|--------------------------------------|----------|----------|-----------------------------------------|--------|--------|-----|
| BRNF15-58B_2_03 | 0.283096                             | 0.000019 | 0.001229                             | 0.000049 | 0.027100                             | 0.001200 | 1.467167                             | 0.000030 | 1.886893                             | 0.000078 | 198.4    | 0.283092                                | 11.0   | 15.3   | 0.7 |
| BRNF15-58B_2_04 | 0.283106                             | 0.000037 | 0.000820                             | 0.000089 | 0.019700                             | 0.002300 | 1.467122                             | 0.000048 | 1.886790                             | 0.000120 | 198.4    | 0.283103                                | 11.4   | 15.7   | 1.3 |
| BRNF15-58B_2_05 | 0.283111                             | 0.000029 | 0.001766                             | 0.000056 | 0.041000                             | 0.001200 | 1.467119                             | 0.000043 | 1.886957                             | 0.000087 | 198.4    | 0.283105                                | 11.5   | 15.7   | 1.0 |
| BRNF15-58B_2_06 | 0.283090                             | 0.000026 | 0.001236                             | 0.000092 | 0.027400                             | 0.002000 | 1.467132                             | 0.000044 | 1.886890                             | 0.000087 | 198.4    | 0.283086                                | 10.8   | 15.0   | 0.9 |
| BRNF15-58B_2_07 | 0.283082                             | 0.000029 | 0.001124                             | 0.000030 | 0.024980                             | 0.000700 | 1.467103                             | 0.000038 | 1.886948                             | 0.000089 | 198.4    | 0.283078                                | 10.5   | 14.8   | 1.0 |
| BRNF15-58B_2_08 | 0.283091                             | 0.000026 | 0.001613                             | 0.000077 | 0.038400                             | 0.002200 | 1.467125                             | 0.000038 | 1.886986                             | 0.000076 | 198.4    | 0.283085                                | 10.8   | 15.0   | 0.9 |
| BRNF15-58B_2_10 | 0.283094                             | 0.000024 | 0.001073                             | 0.000084 | 0.024900                             | 0.002000 | 1.467137                             | 0.000029 | 1.887021                             | 0.000097 | 198.4    | 0.283090                                | 10.9   | 15.2   | 0.8 |
| BRNF15-58B_2_11 | 0.283095                             | 0.000033 | 0.002672                             | 0.000029 | 0.067090                             | 0.000870 | 1.467207                             | 0.000037 | 1.886980                             | 0.000120 | 198.4    | 0.283085                                | 11.0   | 15.0   | 1.2 |
| BRNF15-58B_2_14 | 0.283087                             | 0.000036 | 0.001136                             | 0.000054 | 0.026500                             | 0.001700 | 1.467105                             | 0.000037 | 1.886940                             | 0.000120 | 198.4    | 0.283083                                | 10.7   | 15.0   | 1.3 |
| BRNF15-58B_2_16 | 0.283108                             | 0.000039 | 0.002020                             | 0.000150 | 0.048000                             | 0.004100 | 1.467162                             | 0.000036 | 1.886900                             | 0.000110 | 198.4    | 0.283101                                | 11.4   | 15.6   | 1.4 |



|                 |          |          |          |          |          |          |          |          |          |          |       |          |      |      |     |
|-----------------|----------|----------|----------|----------|----------|----------|----------|----------|----------|----------|-------|----------|------|------|-----|
| BRNF15-58B_2_18 | 0.283067 | 0.000027 | 0.001240 | 0.000075 | 0.030800 | 0.001900 | 1.467129 | 0.000043 | 1.887060 | 0.000120 | 198.4 | 0.283063 | 10.0 | 14.2 | 1.0 |
| Weighted Mean = |          |          |          |          |          |          |          |          |          |          |       |          |      | 15.1 | 0.6 |

# Ruby Batholith plutonics

## Jim River Pluton

| Sample          | <sup>176</sup> Hf/ <sup>177</sup> Hf | 2SE      | <sup>176</sup> Lu/ <sup>177</sup> Hf | 2SE      | <sup>176</sup> Yb/ <sup>177</sup> Hf | 2SE      | <sup>178</sup> Hf/ <sup>177</sup> Hf | 2SE      | <sup>180</sup> Hf/ <sup>177</sup> Hf | 2SE      | Age (Ma) | <sup>176</sup> Hf/ <sup>177</sup> Hf(i) | εHF(0) | εHF(i) | 2SE |
|-----------------|--------------------------------------|----------|--------------------------------------|----------|--------------------------------------|----------|--------------------------------------|----------|--------------------------------------|----------|----------|-----------------------------------------|--------|--------|-----|
| BRHR14-2_01     | 0.282706                             | 0.000039 | 0.000267                             | 0.000027 | 0.006470                             | 0.000730 | 1.467181                             | 0.000050 | 1.887110                             | 0.000120 | 109.0    | 0.282706                                | -2.8   | -0.4   | 1.4 |
| BRHR14-2_03     | 0.282683                             | 0.000037 | 0.000427                             | 0.000008 | 0.011520                             | 0.000130 | 1.467160                             | 0.000048 | 1.887100                             | 0.000120 | 109.0    | 0.282682                                | -3.6   | -1.2   | 1.3 |
| BRHR14-2_04     | 0.282686                             | 0.000052 | 0.000935                             | 0.000015 | 0.025530                             | 0.000270 | 1.467184                             | 0.000064 | 1.887090                             | 0.000140 | 109.0    | 0.282684                                | -3.5   | -1.1   | 1.8 |
| BRHR14-2_05     | 0.282689                             | 0.000060 | 0.000581                             | 0.000018 | 0.015440                             | 0.000450 | 1.467190                             | 0.000056 | 1.887120                             | 0.000120 | 109.0    | 0.282688                                | -3.4   | -1.0   | 2.1 |
| BRHR14-2_06     | 0.282737                             | 0.000045 | 0.000439                             | 0.000004 | 0.011550                             | 0.000210 | 1.467147                             | 0.000044 | 1.887070                             | 0.000120 | 109.0    | 0.282736                                | -1.7   | 0.7    | 1.6 |
| BRHR14-2_08     | 0.282764                             | 0.000038 | 0.000470                             | 0.000002 | 0.012186                             | 0.000042 | 1.467175                             | 0.000047 | 1.887030                             | 0.000110 | 109.0    | 0.282763                                | -0.7   | 1.6    | 1.3 |
| Weighted Mean = |                                      |          |                                      |          |                                      |          |                                      |          |                                      |          |          |                                         |        | -0.1   | 1.2 |

## Bonanza Pluton

| Sample          | <sup>176</sup> Hf/ <sup>177</sup> Hf | 2SE      | <sup>176</sup> Lu/ <sup>177</sup> Hf | 2SE      | <sup>176</sup> Yb/ <sup>177</sup> Hf | 2SE      | <sup>178</sup> Hf/ <sup>177</sup> Hf | 2SE      | <sup>180</sup> Hf/ <sup>177</sup> Hf | 2SE      | Age (Ma) | <sup>176</sup> Hf/ <sup>177</sup> Hf(i) | εHF(0) | εHF(i) | 2SE |
|-----------------|--------------------------------------|----------|--------------------------------------|----------|--------------------------------------|----------|--------------------------------------|----------|--------------------------------------|----------|----------|-----------------------------------------|--------|--------|-----|
| BRHR14-7_01     | 0.282753                             | 0.000035 | 0.000992                             | 0.000017 | 0.023560                             | 0.000500 | 1.467249                             | 0.000057 | 1.887020                             | 0.000120 | 111.8    | 0.282751                                | -1.1   | 1.3    | 1.2 |
| BRHR14-7_02     | 0.282732                             | 0.000041 | 0.001046                             | 0.000011 | 0.026660                             | 0.000400 | 1.467162                             | 0.000053 | 1.886980                             | 0.000130 | 111.8    | 0.282730                                | -1.9   | 0.5    | 1.5 |
| BRHR14-7_04     | 0.282765                             | 0.000034 | 0.001251                             | 0.000024 | 0.032530                             | 0.000770 | 1.467162                             | 0.000052 | 1.886970                             | 0.000110 | 111.8    | 0.282762                                | -0.7   | 1.7    | 1.2 |
| BRHR14-7_14     | 0.282752                             | 0.000039 | 0.002524                             | 0.000075 | 0.067100                             | 0.002200 | 1.467163                             | 0.000037 | 1.887080                             | 0.000120 | 111.8    | 0.282747                                | -1.2   | 1.1    | 1.4 |
| BRHR14-7_17     | 0.282701                             | 0.000038 | 0.001641                             | 0.000020 | 0.043160                             | 0.000480 | 1.467103                             | 0.000048 | 1.887010                             | 0.000110 | 111.8    | 0.282698                                | -3.0   | -0.6   | 1.3 |
| BRHR14-7_18     | 0.282747                             | 0.000043 | 0.000833                             | 0.000041 | 0.020400                             | 0.001100 | 1.467163                             | 0.000048 | 1.887120                             | 0.000130 | 111.8    | 0.282745                                | -1.3   | 1.1    | 1.5 |
| Weighted Mean = |                                      |          |                                      |          |                                      |          |                                      |          |                                      |          |          |                                         |        | 0.9    | 1.1 |
